# Supplementary material for: Epigenetic clock for skin and blood cells applied to Hutchinson Gilford Progeria Syndrome and ex vivo studies
Source: Aging (Albany NY). 2018 Jul 26;10(7):1758–75. doi: 10.18632/aging.101508 (PMC6075434; doi:10.18632/aging.101508)
Supplement: Supplementary Dataset 1 [file aging-10-101508-s004.xlsx]

## Sheet: datSubsetOfdata6UsedInFigureHGP
RowOrderInExcelFile	CellLineID	ProgeriaResearchFoundation.CellineID	PRF.RelationtoProband	DiseaseStatus	ProgeriaMutationalAnalysisDetailed	Female	Age	DNAmAgeSkinClock	AgeAccelSkinClock	DNAmAgeHorvath2013	AgeAccelerationResidualHorvath2013	OldPassageNumber	PassageNumber	PopulationDoublingLevelOriginal	CellCultureCondition	OriginofCells	CorriellID	DNAmethylationRound	BatchID	Batch	SampleID	TissueBank	Tissue	DiseaseStatusDetailed
1	PSADFN086	PSADFN086	Proband	ProgeriaNonClassic	LM Exon 11 c.1968+1GtoA	0	0.58	0.388728	-3.48808	8.74523	-13.9649		4	12	PRF used 15% Fetal Calf Serum contaning medium	PRF.FromCulturedFibroblasts		2	2015-9046	Round2	X200091640068_R02C01	PRF DNA from Cultured Fibroblasts	Fibroblast	ProgeriaNonClassic
2	PSADFN257	PSADFN257	Proband	ProgeriaNonClassic	LM Exon 10 homozygous c.1619 TtoC (p.Met540Thr)	0	1.83	4.43819	-0.506294	25.8258	2.5593		6	18	PRF used 15% Fetal Calf Serum contaning medium	PRF.FromCulturedFibroblasts		2	2015-9046	Round2	X200091640071_R03C01	PRF DNA from Cultured Fibroblasts	Fibroblast	ProgeriaNonClassic
3	PSADFND257	PSADFN257	Proband	ProgeriaNonClassic	LM exon 10 c.1619 TtoC (p.Met540Thr)	0	1.8	4.83587	-0.0829868	22.0318	-1.22134	fresh tissue	6	13		PRF		1	2015-9022-2	Shigemi	X101178130094_R03C01	PRF DNA from fresh tissue	Fibroblast	ProgeriaNonClassic
4	PSADFND317	PSADFN317	Proband (and sibling of PSADFN318)	ProgeriaNonClassic	ZMPste24 Exon 6 heterozygous c.743CtoT(p.Pro248Leu)and Exon 10 heterozygous c.1349GtoA (p.Trp450Stop)	0	3.8	8.86014	2.233	10.2965	-13.8469	fresh tissue	6	13		PRF		1	2015-9022-2	Shigemi	X101178130069_R03C02	PRF DNA from fresh tissue	Fibroblast	ProgeriaNonClassic
5	PSADFND318	PSADFN318	Proband (and sibling of PSADFN317)	ProgeriaNonClassic	ZMPste24 Exon 6 heterozygous c.743 CtoT(p.Pro248Leu)and Exon 10 heterozygous c.1349GtoA (p.Trp450Stop)	0	0.4	7.47674	3.75367	23.9384	1.30838	fresh tissue	6	13		PRF		1	2015-9022-2	Shigemi	X101178130094_R03C02	PRF DNA from fresh tissue	Fibroblast	ProgeriaNonClassic
6	PSADFND392	PSADFN392	Proband	ProgeriaNonClassic	LM Exon 11 c.1968+2TtoC	0	7.3	21.6086	11.992	24.8633	-0.837962	fresh tissue	6	13		PRF		1	2015-9022-2	Shigemi	X101178130071_R06C01	PRF DNA from fresh tissue	Fibroblast	ProgeriaNonClassic
7	HGADFN003	HGADFN003	Proband	ProgeriaClassic	LM Exon 11 heterozygous c.1824CtoT	0	2	3.38737	-1.70232	12.8188	-10.5234		7	21	PRF used 15% Fetal Calf Serum contaning medium	PRF.FromCulturedFibroblasts		2	2015-9046	Round2	X200091640068_R05C01	PRF DNA from Cultured Fibroblasts	Fibroblast	ProgeriaClassic
9	HGADFN169	HGADFN169	Proband	ProgeriaClassic	LM Exon 11 heterozygous c.1824CtoT	0	8.5	23.7258	13.0842	54.7385	28.5032		5	5	PRF used 15% Fetal Calf Serum contaning medium	PRF.FromCulturedFibroblasts		2	2015-9046	Round2	X200091640103_R02C02	PRF DNA from Cultured Fibroblasts	Fibroblast	ProgeriaClassic
13	HGADFND143	HGADFN143	Proband	ProgeriaClassic	LM Exon 11 heterozygous c.1824CtoT	0	8.8	15.6122	4.71439	40.0796	13.7107	fresh tissue	6	13		PRF		1	2015-9022-2	Shigemi	X101178130071_R04C01	PRF DNA from fresh tissue	Fibroblast	ProgeriaClassic
15	HGADFND167	HGADFN167	Proband	ProgeriaClassic	LM Exon 11 heterozygous c.1824CtoT	0	8.4	17.8774	7.32119	26.1875	-0.00337102	fresh tissue	6	13		PRF		1	2015-9022-2	Shigemi	X101178130071_R03C01	PRF DNA from fresh tissue	Fibroblast	ProgeriaClassic
17	HGADFND271	HGADFN271	Proband	ProgeriaClassic	LM Exon 11 heterozygous c.1824CtoT	0	1.3	10.7272	6.23537	17.8719	-5.15875	fresh tissue	6	13		PRF		1	2015-9022-2	Shigemi	X101178130071_R05C01	PRF DNA from fresh tissue	Fibroblast	ProgeriaClassic
8	HGADFN164	HGADFN164	Proband	ProgeriaClassic	LM Exon 11 heterozygous c.1824CtoT	1	4.66	10.6443	3.28259	27.7434	3.21724		7	21	PRF used 15% Fetal Calf Serum contaning medium	PRF.FromCulturedFibroblasts		2	2015-9046	Round2	X200091640093_R01C01	PRF DNA from Cultured Fibroblasts	Fibroblast	ProgeriaClassic
10	HGADFN178	HGADFN178	Proband	ProgeriaClassic	LM Exon 11 heterozygous c.1824CtoT	1	6.92	4.35997	-4.93209	37.8378	12.3057		7	21	PRF used 15% Fetal Calf Serum contaning medium	PRF.FromCulturedFibroblasts		2	2015-9046	Round2	X200091640093_R04C02	PRF DNA from Cultured Fibroblasts	Fibroblast	ProgeriaClassic
11	HGADFND122	HGADFN122	Proband	ProgeriaClassic	LM Exon 11 heterozygous c.1824CtoT	1	5	6.95652	-0.695592	21.2708	-3.4067	fresh tissue	6	13		PRF		1	2015-9022-2	Shigemi	X101178130069_R01C02	PRF DNA from fresh tissue	Fibroblast	ProgeriaClassic
12	HGADFND127	HGADFN127	Proband	ProgeriaClassic	LM Exon 11 heterozygous c.1824CtoT	1	3.8	2.09703	-4.53011	14.8523	-9.29105	fresh tissue	6	13		PRF		1	2015-9022-2	Shigemi	X101032570217_R05C02	PRF DNA from fresh tissue	Fibroblast	ProgeriaClassic
14	HGADFND155	HGADFN155	Proband	ProgeriaClassic	LM Exon 11 heterozygous c.1824CtoT	1	1.1	0.589443	-3.73152	5.86611	-17.0755	fresh tissue	6	13		PRF		1	2015-9022-2	Shigemi	X101178130094_R02C02	PRF DNA from fresh tissue	Fibroblast	ProgeriaClassic
16	HGADFND188	HGADFN188	Proband	ProgeriaClassic	LM Exon 11 heterozygous c.1824CtoT	1	2.3	1.23267	-4.11327	4.13748	-19.3383	fresh tissue	6	13		PRF		1	2015-9022-2	Shigemi	X200091640094_R06C01	PRF DNA from fresh tissue	Fibroblast	ProgeriaClassic
18	HGADFND367	HGADFN367	Proband	ProgeriaClassic	LM Exon 11 heterozygous c.1824CtoT	1	3	17.0998	11.156	35.5649	11.7776	fresh tissue	6	13		PRF		1	2015-9022-2	Shigemi	X101178130094_R04C02	PRF DNA from fresh tissue	Fibroblast	ProgeriaClassic
19	HGFDFND369	HGFDFN369	Father of HGADFN367	control	Not Performed	0	33.8	21.5199	-10.7315	39.1077	1.61144	fresh tissue	6	13		PRF		1	2015-9022-2	Shigemi	X101178130094_R02C01	PRF DNA from fresh tissue	Fibroblast	ParentProgeria
22	PRF319P8	PRF319P8	Father of HGADF167 (not progeria)	control		0	40.42	40.7661	2.86036	44.0353	3.59244		5	15	PRF used 15% Fetal Calf Serum contaning medium	PRF.FromCulturedFibroblasts		2	2015-9046	Round2	X200091640103_R03C02	PRF DNA from Cultured Fibroblasts	Fibroblast	ParentProgeria
23	PRFNo319(P7)	PSFDFN319	Father of PSADFN317 and PSADFN318	control	Not performed	0	39	43.4595	6.76664	41.4216	1.61078	7	7	16.26		PRF		1	2015-9022-2	Shigemi	X101178130071_R06C02	PRF DNA from Cultured Fibroblasts	Fibroblast	ParentProgeria
26	PSFDFND327	PSFDFN327	Father of HGADFN325	control	Not performed	0	36.3	37.5308	3.14411	40.35	1.74096	fresh tissue	6	13		PRF		1	2015-9022-2	Shigemi	X200091640094_R04C01	PRF DNA from fresh tissue	Fibroblast	ParentProgeria
27	PSFDFND394	PSFDFN394	Father of PSADFN392	control	Not performed	0	49.1	55.8099	10.4902	38.1188	-6.18751	fresh tissue	6	13		PRF		1	2015-9022-2	Shigemi	X200091640094_R05C01	PRF DNA from fresh tissue	Fibroblast	ParentProgeria
28	PSFDND319	PSFDFN319	Father of PSADFN317 and PSADFN318	control	Not performed	0	39	39.0477	2.35478	38.6881	-1.12266	fresh tissue	7	16.24		PRF		1	2015-9022-2	Shigemi	X101178130069_R05C02	PRF DNA from fresh tissue	Fibroblast	ParentProgeria
20	HGMDFND090	HGMDFN090	Mother of HGADFN167	control	LM Exon 11 Negative	1	37.8	41.2164	5.54847	31.1287	-8.14801	fresh tissue	6	13		PRF		1	2015-9022-2	Shigemi	X101178130094_R01C02	PRF DNA from fresh tissue	Fibroblast	ParentProgeria
21	HGMDFND368	HGMDFN368	Mother of HGADFN367	control	Not Performed	1	31.6	25.2714	-5.1009	33.5142	-3.00286	fresh tissue	6	13.92		PRF		1	2015-9022-2	Shigemi	X101032570217_R06C02	PRF DNA from fresh tissue	Fibroblast	ParentProgeria
24	PRFNo320(P5)	PSMDFN320	Mother of PSADFN317 and PSADFN318	control	Not Performed	1	36.7	44.7997	10.0713	52.9058	14.1188	5	5	11.6		PRF		1	2015-9022-2	Shigemi	X101178130071_R01C02	PRF DNA from Cultured Fibroblasts	Fibroblast	ParentProgeria
25	PRFNo368(P6)	HGMDFN368	Mother of HGADFN367	control	Not Performed	1	31.6	19.7578	-10.6145	30.8325	-5.68458	6	6	13.92		PRF		1	2015-9022-2	Shigemi	X101178130092_R03C01	PRF DNA from Cultured Fibroblasts	Fibroblast	ParentProgeria
29	PSMDFND320	PSMDFN320	Mother of PSADFN317 and PSADFN318	control	Not Performed	1	36.7	43.5408	8.8124	51.0398	12.2527	fresh tissue	5	11.6		PRF		1	2015-9022-2	Shigemi	X200091640094_R03C01	PRF DNA from fresh tissue	Fibroblast	ParentProgeria
30	PSMDFND326	PSMDFN326	Mother of HGADFN325	control	Not performed	1	36.8	37.0877	2.27387	44.0499	5.21833	fresh tissue	6	13		PRF		1	2015-9022-2	Shigemi	X101178130071_R05C02	PRF DNA from fresh tissue	Fibroblast	ParentProgeria
31	PSMDFND346	PSMDFN346	Mother of PSADFN345 proband line not available	control	LM Exon 11 Negative	1	21.8	27.3	5.29837	37.1643	5.00921	fresh tissue	6	13		PRF		1	2015-9022-2	Shigemi	X101178130069_R04C02	PRF DNA from fresh tissue	Fibroblast	ParentProgeria
32	PSMDFND393	PSMDFN393	Mother of PSADFN392	control	Not performed	1	44.7	55.2336	13.6721	60.7116	18.3637	fresh tissue	6	13		PRF		1	2015-9022-2	Shigemi	X101178130092_R02C01	PRF DNA from fresh tissue	Fibroblast	ParentProgeria
33	13HGFDFNDNA168	13HGFDFNDNA168	Father of HGADF167 (not progeria)	control		0	40.42	39.5654	1.65963	47.65	7.20719		5	15	PRF used 15% Fetal Calf Serum contaning medium	PRF.FromCulturedFibroblasts		2	2015-9046	Round2	X200091640103_R02C01	PRF DNA from Cultured Fibroblasts	Fibroblast	control
36	22HDF2718P2			control		0	0	-0.117186	-3.49859	13.4788	-8.97325		8	26	No Virus infection. Control (same passage number) of HDF 2718 GFP P0 and HDF2718HPCP2 Standard cell culture condition (minimum Fetal Caldf Serum 2% containing medium))	Cell Applications		2	2015-9046	Round2	X200091640068_R02C02	Cell Applications	Fibroblast	control
37	23HDF2741P2			control		0	0	-0.503383	-3.88479	11.679	-10.7731		8	26	No Virus infection. Control (same passage number) of HDF 2741 GFP P0 and HDF2741HPCP2 Standard cell culture condition (minimum Fetal Caldf Serum 2% containing medium))	Cell Applications		2	2015-9046	Round2	X200091640093_R04C01	Cell Applications	Fibroblast	control
38	24HDF2744P2			control		0	0	-0.367868	-3.74927	16.046	-6.40605		8	25	No Virus inbfection. Control (same passage number) of HDF 2744 GFP P0 and HDF2744HPCP2 Standard cell culture condition (minimum Fetal Caldf Serum 2% containing medium))	Cell Applications		2	2015-9046	Round2	X200091640071_R04C01	Cell Applications	Fibroblast	control
39	25HDF2747P2			control		0	0	-0.395017	-3.77642	14.4398	-8.0122		8	26	No Virus inbfection. Control (same passage number) of HDF 2747 GFP P0 and HDF2747HPCP2 Standard cell culture condition (minimum Fetal Caldf Serum 2% containing medium))	Cell Applications		2	2015-9046	Round2	X200091640103_R05C01	Cell Applications	Fibroblast	control
44	5HDF2718P1			control		0	0	-0.158405	-3.53981	9.47456	-12.9775		7	23	Standard cell culture condition (minimum Fetal Caldf Serum 2% containing medium))	Cell Applications		2	2015-9046	Round2	X200091640103_R04C02	Cell Applications	Fibroblast	control
45	6HDF2741P1			control		0	0	-0.514407	-3.89581	11.3586	-11.0935		7	23	Standard cell culture condition (minimum Fetal Caldf Serum 2% containing medium))	Cell Applications		2	2015-9046	Round2	X200091640093_R03C01	Cell Applications	Fibroblast	control
46	7HDF2744P1			control		0	0	-0.416029	-3.79744	15.3436	-7.10843		7	22	Standard cell culture condition (minimum Fetal Caldf Serum 2% containing medium))	Cell Applications		2	2015-9046	Round2	X200091640093_R03C02	Cell Applications	Fibroblast	control
47	8HDF2747P1			control		0	0	-0.256294	-3.6377	11.5865	-10.8655		7	23	Standard cell culture condition (minimum Fetal Caldf Serum 2% containing medium))	Cell Applications		2	2015-9046	Round2	X200091640103_R04C01	Cell Applications	Fibroblast	control
48	AG01518			control		0	0	0.12733	-3.25408	17.845	-4.60702			21		Coriell	AG01518	2	2015-9046	Round2	X200091640068_R05C02	CoriellInstitute	Fibroblast	control
49	AG07095			control		0	2	1.84679	-3.2429	24.7986	1.45636			21		Coriell	AG07095	2	2015-9046	Round2	X200091640093_R06C02	CoriellInstitute	Fibroblast	control
50	AG07095			control		0	2	1.93825	-3.15143	23.5099	0.167689			21		AndrewYoo	AG07095	1	2015-9022-2	ChristineHuAndrewYoo	X200091640079_R02C02	CoriellInstitute	Fibroblast	control
51	AG08498			control		0	1	1.08289	-3.15266	34.8918	11.9947			21		Coriell	AG08498	2	2015-9046	Round2	X200091640093_R05C02	CoriellInstitute	Fibroblast	control
52	AG08498			control		0	1	1.31318	-2.92236	32.2913	9.39415			21		AndrewYoo	AG08498	1	2015-9022-2	ChristineHuAndrewYoo	X101032570217_R04C01	CoriellInstitute	Fibroblast	control
53	GM00316			control		0	12	27.8615	14.2304	35.1966	7.40345			14		AndrewYoo	GM00316	1	2015-9022-2	ChristineHuAndrewYoo	X200091640079_R06C01	CoriellInstitute	Fibroblast	control
54	GM00409			control		0	7	9.8309	0.470509	39.212	13.6444			NA		Coriell	GM00409	2	2015-9046	Round2	X200091640071_R02C02	CoriellInstitute	Fibroblast	control
55	GM00499			control		0	8	10.2087	-0.0058134	28.9312	2.91843			13		Coriell	GM00499	2	2015-9046	Round2	X200091640071_R05C02	CoriellInstitute	Fibroblast	control
56	GM00499			control		0	8	10.5639	0.34932	31.5947	5.58191			13		AndrewYoo	GM00499	1	2015-9022-2	ChristineHuAndrewYoo	X101178130092_R06C02	CoriellInstitute	Fibroblast	control
57	GM00500			control		0	10	7.28174	-4.64107	38.3153	11.4123			13		Coriell	GM00500	2	2015-9046	Round2	X200091640071_R03C02	CoriellInstitute	Fibroblast	control
58	GM00500			control		0	10	8.21072	-3.7121	37.274	10.371			13		AndrewYoo	GM00500	1	2015-9022-2	ChristineHuAndrewYoo	X101178130092_R05C02	CoriellInstitute	Fibroblast	control
59	GM02987			control		0	19	24.1699	4.55983	39.4631	8.55422			13		AndrewYoo	GM02987	1	2015-9022-2	ChristineHuAndrewYoo	X200091640094_R02C02	CoriellInstitute	Fibroblast	control
60	GM03349			control		0	10	6.8196	-5.10321	37.0273	10.1244			11		Coriell	GM03349	2	2015-9046	Round2	X200091640071_R01C02	CoriellInstitute	Fibroblast	control
61	GM03349			control		0	10	7.13354	-4.78927	38.3025	11.3995			11		AndrewYoo	GM03349	1	2015-9022-2	ChristineHuAndrewYoo	X101178130092_R04C02	CoriellInstitute	Fibroblast	control
62	GM03377			control		0	19	43.5716	23.9615	55.5875	24.6787			14		Coriell	GM03377	2	2015-9046	Round2	X200091640112_R01C02	CoriellInstitute	Fibroblast	control
63	GM03377			control		0	19	43.8456	24.2356	50.0588	19.15			14		AndrewYoo	GM03377	1	2015-9022-2	ChristineHuAndrewYoo	X200091640079_R06C02	CoriellInstitute	Fibroblast	control
64	GM05381			control		0	5	2.35099	-5.30112	45.285	20.6075			6		Coriell	GM05381	2	2015-9046	Round2	X200091640103_R05C02	CoriellInstitute	Fibroblast	control
65	GM05381			control		0	5	3.05964	-4.59247	43.4306	18.7531			6		AndrewYoo	GM05381	1	2015-9022-2	ChristineHuAndrewYoo	X101178130092_R02C02	CoriellInstitute	Fibroblast	control
66	GM05400			control		0	6	6.39278	-2.11347	30.0025	4.87995			12.8		Coriell	GM05400	2	2015-9046	Round2	X200091640103_R06C02	CoriellInstitute	Fibroblast	control
67	GM05400			control		0	6	7.40691	-1.09934	33.1746	8.05202			12.8		Coriell	GM05400	2	2015-9046	Round2	X200091640112_R06C02	CoriellInstitute	Fibroblast	control
68	GM05400			control		0	6	8.24039	-0.265864	32.2529	7.13032			12.8		AndrewYoo	GM05400	1	2015-9022-2	ChristineHuAndrewYoo	X200091640079_R05C02	CoriellInstitute	Fibroblast	control
69	GM05757			control		0	7	6.05319	-3.3072	26.0925	0.5248			7		Coriell	GM05757	2	2015-9046	Round2	X200091640071_R06C01	CoriellInstitute	Fibroblast	control
70	GM05757			control		0	7	7.47178	-1.88861	23.4612	-2.10647			7		AndrewYoo	GM05757	1	2015-9022-2	ChristineHuAndrewYoo	X101178130069_R06C02	CoriellInstitute	Fibroblast	control
71	GM08333			control		0	0.42	0.499029	-3.24112	25.8827	3.2437			21		Coriell	GM08333	2	2015-9046	Round2	X200091640068_R06C02	CoriellInstitute	Fibroblast	control
72	GM08333			control		0	0.42	0.761907	-2.97824	26.9299	4.291			21		AndrewYoo	GM08333	1	2015-9022-2	ChristineHuAndrewYoo	X101178130069_R04C01	CoriellInstitute	Fibroblast	control
73	GM08398			control		0	8	13.8296	3.61511	37.4979	11.4851			9		AndrewYoo	GM08398	1	2015-9022-2	ChristineHuAndrewYoo	X101178130071_R02C02	CoriellInstitute	Fibroblast	control
74	GM09503			control		0	10	5.85581	-6.067	32.4778	5.57479			5		Coriell	GM09503	2	2015-9046	Round2	X200091640071_R06C02	CoriellInstitute	Fibroblast	control
75	GM09503			control		0	10	6.06972	-5.85309	36.1857	9.2827			NA		AndrewYoo	GM09503	1	2015-9022-2	Shigemi	X101178130012_R06C02	CoriellInstitute	Fibroblast	control
76	GM09503			control		0	10	7.44568	-4.47713	38.3423	11.4393			5		AndrewYoo	GM09503	1	2015-9022-2	ChristineHuAndrewYoo	X101178130094_R04C01	CoriellInstitute	Fibroblast	control
77	HDFNo1249			control		0	0	-0.221425	-3.60283	11.0597	-11.3923	5	6	13.92		CellApplications		1	2015-9022-2	Shigemi	X101178130069_R02C02	Cell Applications	Fibroblast	control
78	HDFNo1249			control		0	0	-0.225252	-3.60666	12.942	-9.51003	5	6	14.6		CellApplications		1	2015-9022-2	Shigemi	X101178130094_R05C02	Cell Applications	Fibroblast	control
87	HDFNo2371			control		0	0	2.07509	-1.30632	29.0611	6.60906	5	6	NA		CellApplications		1	2015-9022-2	Shigemi	X101178130092_R01C01	Cell Applications	Fibroblast	control
88	HDFNo2371			control		0	0	1.70231	-1.6791	33.7474	11.2954	5	6	14.6		CellApplications		1	2015-9022-2	Shigemi	X101178130094_R01C01	Cell Applications	Fibroblast	control
34	1HDF2042P1			control		1	38	37.4653	1.62658	47.106	7.74028		7	22	Standard cell culture condition (minimum Fetal Caldf Serum 2% containing medium))	Cell Applications		2	2015-9046	Round2	X200091640068_R06C01	Cell Applications	Fibroblast	control
35	21HDF2942P2			control		1	31	50.0661	20.2063	51.1452	14.8952		8	26	No Virus inbfection. Control (same passage number) of HDF 2942 GFP P0 and HDF2942HPCP2 Standard cell culture condition (minimum Fetal Caldf Serum 2% containing medium))	Cell Applications		2	2015-9046	Round2	X200091640068_R01C02	Cell Applications	Fibroblast	control
40	2HDF2146P1			control		1	28	61.2798	33.9824	54.8635	19.9488		7	22	Standard cell culture condition (minimum Fetal Caldf Serum 2% containing medium))	Cell Applications		2	2015-9046	Round2	X200091640093_R02C01	Cell Applications	Fibroblast	control
41	30HDF2146P2			control		1	28	59.9396	32.6422	53.6541	18.7393		8	25		Cell Applications		2	2015-9046	Round2	X200091640093_R01C02	Cell Applications	Fibroblast	control
42	3HDF2662P1			control		1	46	52.3311	9.65918	36.1774	-6.74912		7	22	Standard cell culture condition (minimum Fetal Caldf Serum 2% containing medium))	Cell Applications		2	2015-9046	Round2	X200091640068_R04C02	Cell Applications	Fibroblast	control
43	4HDF2942P1			control		1	31	49.4383	19.5786	49.0328	12.7828		7	23	Standard cell culture condition (minimum Fetal Caldf Serum 2% containing medium))	Cell Applications		2	2015-9046	Round2	X200091640103_R01C02	Cell Applications	Fibroblast	control
79	HDFNo1554(P1)_2weeks			control		1	77	62.7476	-6.40263	56.7347	0.0102045		7	16.24		CellApplications		1	2015-9022-2	Shigemi	X101178130092_R05C01	Cell Applications	Fibroblast	control
80	HDFNo1554-7			control		1	77	67.0653	-2.08492	49.1465	-7.57801		8	18.4	12 weeks culture with serum contaning medium	CellApplications		1	2015-9022-2	Shigemi	X200091640094_R01C01	Cell Applications	Fibroblast	control
81	HDFNo1709(P1)			control		1	36	45.4738	11.3433	49.615	11.1395	1	7	16.24	1 weeks culture with serum contaning medium	CellApplications		1	2015-9022-2	Shigemi	X101178130092_R06C01	Cell Applications	Fibroblast	control
82	HDFNo1709(P1)_2weeks			control		1	36	46.0897	11.9592	48.3733	9.89782		7	17.5		CellApplications		1	2015-9022-2	Shigemi	X200091640079_R02C01	Cell Applications	Fibroblast	control
83	HDFNo1709-1			control		1	36	45.696	11.5656	49.9037	11.4282		8	18.4	12 weeks culture (36y)	CellApplications		1	2015-9022-2	Shigemi	X101178130094_R06C01	Cell Applications	Fibroblast	control
84	HDFNo1709-2			control		1	36	45.5043	11.3738	51.7017	13.2262		8	18.4	6 weeks culture (36y)	CellApplications		1	2015-9022-2	Shigemi	X200091640079_R04C02	Cell Applications	Fibroblast	control
85	HDFNo1709-3			control		1	36	46.013	11.8825	51.2466	12.7711		8	18.4		CellApplications		1	2015-9022-2	Shigemi	X200091640094_R02C01	Cell Applications	Fibroblast	control
86	HDFNo1709-7			control		1	36	48.7972	14.6667	46.5007	8.02515		8	18.4	12 weeks culture with serum contaning medium	CellApplications		1	2015-9022-2	Shigemi	X101032570217_R02C01	Cell Applications	Fibroblast	control
