# Supplementary material for: Epigenetic clock for skin and blood cells applied to Hutchinson Gilford Progeria Syndrome and ex vivo studies
Source: Aging (Albany NY). 2018 Jul 26;10(7):1758–75. doi: 10.18632/aging.101508 (PMC6075434; doi:10.18632/aging.101508)
Supplement: Supplementary Dataset 2 [file aging-10-101508-s005.csv]

ID	Coef	corAgeTraining	chr	pos	strand	UCSC_RefGene_Name	UCSC_RefGene_Accession	UCSC_RefGene_Group	Phantom4_Enhancers	Phantom5_Enhancers	DMR	X450k_Enhancer	HMM_Island	Regulatory_Feature_Name	OpenChromatin_NAME	TFBS_NAME	Methyl27_Loci	Methyl450_Loci	CpGnumber
(Intercept)	-0.447119319	NA	NA	NA	NA	NA	NA	NA	NA	NA	NA	NA	NA	NA	NA	NA	NA	NA
cg12140144	0.36318117	0.371780009	chr1	2984275	-	FLJ42875;PRDM16;FLJ42875;PRDM16	NR_024371;NM_199454;NR_015440;NM_022114	Body;TSS1500;Body;TSS1500				NA	1:2973786-2977805		chr1:2976517-2991800		NA	TRUE	1
cg26933021	-0.09050009	-0.569686831	chr1	12618574	-							TRUE	1:12541103-12541183				NA	TRUE	2
cg20822990	-0.007025234	0.519171973	chr1	17338766	-	ATP13A2;ATP13A2;ATP13A2	NM_022089;NM_001141974;NM_001141973	TSS1500;TSS1500;TSS1500				TRUE		1:17336920-17338827			NA	TRUE	3
cg07312601	-0.1350924	-0.422485466	chr1	19583887	-	MRTO4	NM_016183	Body				NA		1:19583679-19583890			NA	TRUE	4
cg09993145	-0.04263934	-0.523451174	chr1	25291905	-	RUNX3	NM_001031680	TSS1500				NA		1:25291322-25292142			NA	TRUE	5
cg23605843	0.079387235	0.458996024	chr1	26735630	+							NA	1:26608193-26608253	1:26735051-26735681	chr1:26734963-26738647	chr1:26734306-26740341	NA	TRUE	6
cg25410668	0.278005252	0.751301629	chr1	28241577	-	RPA2	NM_002946	TSS1500				NA	1:28113187-28114165	1:28240552-28241702	chr1:28240452-28241804	chr1:28240158-28242108	NA	TRUE	7
cg17879376	-0.202709389	-0.727266244	chr1	32212024	-	BAI2	NM_001703	Body				TRUE					NA	TRUE	8
cg14962509	0.18231053	0.255286221	chr1	36039655	+	TFAP2E	NM_178548	Body				TRUE	1:35811251-35813151				NA	TRUE	9
cg24375409	-0.023804586	0.653555624	chr1	38200920	+	EPHA10	NM_001099439	Body				NA	1:37973507-37973728		chr1:38200680-38201431		NA	TRUE	10
cg22851420	0.097197819	0.623545269	chr1	40149650	+	HPCAL4	NM_016257	Body				NA	1:39922019-39922574	1:40149311-40150345			NA	TRUE	11
cg24107728	-0.106542738	0.348239185	chr1	53760337	-	LRP8;LRP8;LRP8;LRP8	NM_033300;NM_001018054;NM_017522;NM_004631	Body;Body;Body;Body				TRUE		1:53760240-53760923			NA	TRUE	12
cg14614643	-0.043392987	-0.78455945	chr1	56646507	-							TRUE			chr1:56646402-56646839		NA	TRUE	13
cg00257455	-0.161698597	-0.776045725	chr1	65530538	-							NA					NA	TRUE	14
cg23045908	0.137327056	-0.736107362	chr1	66799419	-	PDE4B;PDE4B;PDE4B;PDE4B	NM_001037341;NM_001037339;NM_001037340;NM_002600	Body;Body;Body;Body				TRUE		1:66799308-66799445			NA	TRUE	15
cg15201877	0.39209762	0.661820876	chr1	71512973	+	PTGER3;PTGER3;PTGER3;PTGER3;PTGER3;PTGER3;PTGER3;PTGER3;PTGER3;PTGER3	NM_198718;NR_028294;NM_198714;NR_028293;NM_198716;NM_198717;NR_028292;NM_001126044;NM_198719;NM_198715	1stExon;Body;1stExon;Body;1stExon;1stExon;Body;1stExon;1stExon;1stExon				TRUE	1:71284815-71286418	1:71512684-71513685			TRUE	TRUE	16
cg18933331	-0.231762834	-0.154759568	chr1	110186418	-							TRUE		1:110185798-110186499	chr1:110185852-110186809	chr1:110185316-110186539	NA	TRUE	17
cg05675373	0.024479256	0.575091117	chr1	110754257	+	KCNC4;KCNC4;KCNC4	NM_001039574;NM_004978;NM_153763	1stExon;1stExon;1stExon				NA	1:110553818-110556317				TRUE	TRUE	18
cg19269039	-0.017557985	-0.294986941	chr1	111743200	+	DENND2D;DENND2D	NM_024901;NM_024901	1stExon;5'UTR	low-CpG:111544264-111544835			NA		1:111742893-111743586			NA	TRUE	19
cg16008966	-0.203907755	-0.711338501	chr1	114761794	+							TRUE				chr1:114760975-114762747	NA	TRUE	20
cg14565725	-0.035564076	-0.425665003	chr1	119532044	-	TBX15;TBX15	NM_152380;NM_152380	1stExon;5'UTR				TRUE	1:119333515-119333932				NA	TRUE	21
cg05940231	-0.106704842	-0.546315218	chr1	119532189	-	TBX15	NM_152380	TSS200				TRUE	1:119333515-119333932				NA	TRUE	22
cg03984502	0.222121301	-0.138018557	chr1	151805661	-	RORC	NM_005060	TSS1500				NA			chr1:151801374-151805964		NA	TRUE	23
cg25256723	-0.120981399	0.064285617	chr1	169555944	+	F5	NM_000130	TSS200				NA		1:169555452-169556050	chr1:169555462-169556142	chr1:169553593-169556543	TRUE	TRUE	24
cg16054275	-0.233968201	-0.487083115	chr1	169556022	+	F5	NM_000130	TSS1500				NA		1:169555452-169556050	chr1:169555462-169556142	chr1:169553593-169556543	NA	TRUE	25
cg01459453	0.041907941	-0.665033982	chr1	169599212	-	SELP	NM_003005	Body				NA					TRUE	TRUE	26
cg16599143	0.141980111	0.665245217	chr1	171058672	+	FMO3;FMO3	NM_006894;NM_001002294	TSS1500;TSS1500				NA					NA	TRUE	27
cg02275294	-0.142869288	-0.666621384	chr1	179262462	+	SOAT1	NM_003101	TSS1500				NA		1:179262385-179263640			TRUE	TRUE	28
cg21870884	-0.012681435	0.565124881	chr1	200842429	-	GPR25	NM_005298	1stExon				NA	1:199108820-199110011				TRUE	TRUE	29
cg10501210	-0.316526361	-0.798352951	chr1	207997020	+						CDMR	TRUE	1:206063625-206063801			chr1:207967640-208001129	NA	TRUE	30
cg02901139	-0.073114832	-0.307512559	chr1	212605929	+	NENF;NENF	NM_013349;NR_026598	TSS1500;TSS1500				NA					NA	TRUE	31
cg11298786	-0.196433893	-0.600264052	chr1	228195794	+	WNT3A	NM_033131	Body				NA	1:226262000-226263095	1:228195100-228195894			NA	TRUE	32
cg09809672	-0.100326137	-0.476017355	chr1	236557682	-	EDARADD;EDARADD;EDARADD	NM_080738;NM_145861;NM_145861	TSS1500;5'UTR;1stExon				NA					TRUE	TRUE	33
cg05940691	-0.059992468	0.741075455	chr1	241912764	+	WDR64	NM_144625	Body				NA			chr1:241912374-241914021	chr1:241912309-241913953	NA	TRUE	34
cg12869659	-0.042567598	-0.674414118	chr1	244213618	+	ZNF238	NM_205768	TSS1500				TRUE					NA	TRUE	35
cg23028740	-0.009884695	0.716231201	chr1	244545617	+	C1orf100	NM_001012970	Body				TRUE					NA	TRUE	36
cg10959651	-0.038209171	-0.8355857	chr2	7018020	-	RSAD2	NM_080657	1stExon				NA		2:7017313-7018189	chr2:7017353-7018474	chr2:7017306-7022256	NA	TRUE	37
cg00522231	0.018122037	0.74732713	chr2	9549277	-	ITGB1BP1;ITGB1BP1	NM_004763;NM_022334	Body;Body				NA	2:9466724-9466788		chr2:9548900-9549406		NA	TRUE	38
cg01752203	-0.0219794	-0.444233571	chr2	15948462	+							NA	2:15865825-15866181				NA	TRUE	39
cg23643435	0.012875413	0.233734555	chr2	38893251	+	GALM;GALM	NM_138801;NM_138801	5'UTR;1stExon	low-CpG:38746556-38746777			NA	2:38746741-38747118	2:38892805-38893410			NA	TRUE	40
cg01243072	-0.00132993	-0.715406347	chr2	43398171	+							NA	2:43251583-43251695				NA	TRUE	41
cg07589899	0.106602051	0.762614272	chr2	62020677	+							NA	2:61874172-61874493	2:62019647-62020956			NA	TRUE	42
cg10855531	-0.300557382	-0.832193017	chr2	62702472	-							TRUE					NA	TRUE	43
cg22943590	-0.083177673	-0.665581263	chr2	66648797	+							NA					NA	TRUE	44
cg23398076	0.005661222	0.17322835	chr2	66664960	+	MEIS1	NM_002398	Body				NA	2:66518302-66518513				NA	TRUE	45
cg12082609	0.154152131	0.420981166	chr2	66671727	-	MEIS1	NM_002398	Body				NA	2:66525086-66525363				NA	TRUE	46
cg01447660	-0.115749983	-0.320200167	chr2	69152678	-							TRUE		2:69152152-69153337			NA	TRUE	47
cg02085953	0.019920164	-0.725336055	chr2	97202260	+	ARID5A	NM_212481	TSS1500				NA		2:97202196-97202767			NA	TRUE	48
cg15149655	0.200278685	0.625773965	chr2	98703698	+	VWA3B;VWA3B	NM_144992;NM_144992	1stExon;5'UTR				TRUE	2:98069799-98070437	2:98703405-98703709	chr2:98702841-98705060	chr2:98702847-98704317	NA	TRUE	49
cg22809047	0.118967117	0.672409496	chr2	101618261	+	RPL31;RPL31;RPL31	NM_001099693;NM_000993;NM_001098577	TSS1500;TSS1500;TSS1500				NA	2:100984690-100985929				TRUE	TRUE	50
cg06639320	0.019738695	0.829499951	chr2	106015739	-	FHL2;FHL2;FHL2;FHL2	NM_001039492;NM_001450;NM_201557;NM_201555	TSS200;TSS200;5'UTR;TSS200				NA	2:105381311-105382817	2:106014507-106016259			NA	TRUE	51
cg22454769	0.05186605	0.828996207	chr2	106015767	-	FHL2;FHL2;FHL2;FHL2	NM_001039492;NM_001450;NM_201557;NM_201555	TSS200;TSS200;5'UTR;TSS200				NA	2:105381311-105382817	2:106014507-106016259			NA	TRUE	52
cg00017842	0.156359902	0.138028039	chr2	119528421	-							NA					NA	TRUE	53
cg23606718	0.700747251	0.70947926	chr2	131513927	+	FAM123C;FAM123C;FAM123C;FAM123C;FAM123C;FAM123C	NM_152698;NM_001105194;NM_001105195;NM_001105194;NM_001105193;NM_001105195	5'UTR;5'UTR;1stExon;1stExon;5'UTR;5'UTR			DMR	NA	2:131229834-131230653	2:131513688-131513993			NA	TRUE	54
cg22061831	-0.177458031	-0.237057914	chr2	131721692	-	ARHGEF4;ARHGEF4	NM_032995;NM_015320	Body;Body			DMR	NA	2:131437224-131438745	2:131721618-131721793			NA	TRUE	55
cg12757011	0.155998605	0.289972767	chr2	162281111	-	TBR1	NM_006593	3'UTR			CDMR	NA	2:161989273-161989369	2:162280856-162281431			NA	TRUE	56
cg01620164	-0.065414051	-0.556619642	chr2	164590272	-	FIGN	NM_018086	Body				NA					NA	TRUE	57
cg12105450	0.009944802	-0.212255072	chr2	202048100	-	CASP10;CASP10;CASP10	NM_001230;NM_032977;NM_032974	5'UTR;5'UTR;5'UTR				NA		2:202047464-202048322			TRUE	TRUE	58
cg00760938	0.077199533	0.770513852	chr2	217357159	+							TRUE		2:217357037-217357278			NA	TRUE	59
cg10376763	-0.092087268	0.33875585	chr2	217724363	-	TNP1	NM_003284	3'UTR				NA					TRUE	TRUE	60
cg23077820	0.061010377	0.429866688	chr2	223154176	+	PAX3;PAX3;PAX3;PAX3;PAX3;PAX3	NM_181458;NM_181461;NM_181459;NM_181460;NM_181457;NM_001127366	Body;Body;Body;Body;Body;Body			RDMR	NA	2:222862384-222862446				NA	TRUE	61
cg08166272	0.105439453	0.537446257	chr2	227663151	-	IRS1	NM_005544	1stExon			DMR	NA	2:227370118-227373198	2:227663120-227663449			NA	TRUE	62
cg10523019	0.126151862	0.527896838	chr2	227700458	+	RHBDD1;RHBDD1	NM_001167608;NM_032276	TSS1500;TSS1500				NA	2:227408409-227409402	2:227700063-227701680			TRUE	TRUE	63
cg23462687	-0.18373491	-0.370775592	chr2	240060883	+	HDAC4	NM_006037	Body				NA	2:239725745-239725821				NA	TRUE	64
cg20669012	0.126231651	-0.36124463	chr3	11102341	+							TRUE		3:11102257-11102800			NA	TRUE	65
cg03183882	-1.007388736	-0.465115787	chr3	15373315	-	SH3BP5;SH3BP5	NM_004844;NM_001018009	Body;5'UTR				NA	3:15348111-15349561	3:15372866-15374668			NA	TRUE	66
cg15910502	-0.133774268	0.039834281	chr3	20085136	-	KAT2B	NM_003884	Body				NA		3:20084873-20085647			NA	TRUE	67
cg12941369	0.024191779	0.353449914	chr3	33839389	-	PDCD6IP;PDCD6IP;PDCD6IP	NM_001162429;NM_013374;NR_027868	TSS1500;TSS1500;TSS1500				NA		3:33838984-33839459		chr3:33839228-33841488	TRUE	TRUE	68
cg02244028	0.004509242	0.325679308	chr3	38992200	-	SCN11A	NM_014139	TSS200				NA					NA	TRUE	69
cg24888989	1.230382387	0.187809878	chr3	44803291	-	KIF15;KIF15;KIAA1143	NM_020242;NM_020242;NM_020696	1stExon;5'UTR;TSS200	high-CpG:44778257-44778351			NA	3:44777786-44778702	3:44802688-44803529			NA	TRUE	70
cg00702638	0.725076159	0.195752842	chr3	44803293	-	KIF15;KIF15;KIAA1143	NM_020242;NM_020242;NM_020696	1stExon;5'UTR;TSS200	high-CpG:44778257-44778351			NA	3:44777786-44778702	3:44802688-44803529			NA	TRUE	71
cg07303143	0.734120702	-0.037122184	chr3	44803452	-	KIAA1143;KIF15	NM_020696;NM_020242	TSS1500;Body				NA	3:44777786-44778702	3:44802688-44803529			NA	TRUE	72
cg26614073	-0.12422813	-0.595378048	chr3	47517819	-	SCAP	NM_012235	TSS1500				NA		3:47516538-47518383		chr3:47516129-47518208	TRUE	TRUE	73
cg15988232	-0.058416229	0.583445994	chr3	47621127	+	CSPG5	NM_006574	TSS1500				NA					TRUE	TRUE	74
cg16933388	0.133862484	0.656815784	chr3	49592529	+	BSN	NM_003458	Body				NA		3:49591105-49592556			TRUE	TRUE	75
cg19381811	-0.028321608	-0.704156362	chr3	49851713	-	UBA7	NM_003335	TSS1500				NA		3:49850937-49851760			NA	TRUE	76
cg03019000	-0.084379082	-0.366124189	chr3	51704351	+	TEX264;TEX264;TEX264	NR_024012;NM_001129884;NM_015926	TSS1500;TSS1500;TSS1500				NA		3:51702929-51704478	chr3:51702864-51706875	chr3:51702814-51706890	TRUE	TRUE	77
cg01844642	0.093411763	0.693274979	chr3	51989764	-	GPR62	NM_080865	1stExon				TRUE	3:51964804-51965628				NA	TRUE	78
cg04474832	0.120529911	0.24481964	chr3	52008487	+	ABHD14B;ABHD14B;ABHD14B;ABHD14A;ABHD14B;ABHD14B	NM_001146314;NR_027476;NM_032750;NM_015407;NM_032750;NM_001146314	1stExon;Body;5'UTR;TSS1500;1stExon;5'UTR				TRUE	3:51982751-51985402	3:52007848-52009460			TRUE	TRUE	79
cg03891319	-0.256080839	-0.129520545	chr3	52016838	-	ACY1	NM_000666	TSS1500				NA		3:52016250-52017641			TRUE	TRUE	80
cg03607117	0.16978081	0.460237763	chr3	53080440	+	SFMBT1;SFMBT1;SFMBT1	NM_001005159;NM_016329;NM_001005158	TSS1500;TSS1500;TSS1500	high-CpG:53054999-53055997			NA	3:53053856-53056190				NA	TRUE	81
cg22264409	0.025065715	0.388333134	chr3	71828408	+	PROK2;PROK2	NM_021935;NM_001126128	Body;Body				TRUE					NA	TRUE	82
cg11205552	0.03974515	-0.541701187	chr3	112995690	-	BOC	NM_033254	Body				TRUE			chr3:112994512-112998153	chr3:112994468-112995695	NA	TRUE	83
cg17321954	0.473386142	0.28481952	chr3	120626881	-	STXBP5L	NM_014980	TSS200			DMR	NA	3:122109343-122110635				NA	TRUE	84
cg06796779	0.053573181	-0.281548776	chr3	128204927	-	GATA2;GATA2;GATA2	NM_001145661;NM_032638;NM_001145662	Body;Body;Body				TRUE	3:129687477-129687618				NA	TRUE	85
cg18303397	0.021787708	-0.170604214	chr3	129160135	-	IFT122;IFT122;MBD4;IFT122;IFT122	NM_052990;NM_018262;NM_003925;NM_052985;NM_052989	Body;Body;TSS1500;Body;Body			RDMR	NA		3:129160116-129160320			TRUE	TRUE	86
cg09025210	0.038797211	-0.26514761	chr3	141132146	+	ZBTB38	NM_001080412	5'UTR		chr3:141131755-141131755		TRUE					NA	TRUE	87
cg14423778	0.060485029	-0.602440079	chr3	151985433	+	MBNL1;MBNL1;LOC401093;LOC401093	NM_207292;NM_021038;NR_027038;NR_027037	TSS1500;TSS1500;Body;Body			RDMR	NA					TRUE	TRUE	88
cg15277914	-0.033373318	-0.259976979	chr3	154042611	-	DHX36;DHX36	NM_001114397;NM_020865	TSS1500;TSS1500				NA		3:154041214-154042944			NA	TRUE	89
cg07553761	0.26245025	0.625047669	chr3	160167977	+	TRIM59	NM_173084	TSS1500				NA	3:161649892-161650878	3:160166409-160168278			NA	TRUE	90
cg06737494	0.063912268	0.671651029	chr3	172167644	+	GHSR;GHSR	NM_198407;NM_004122	TSS1500;TSS1500				TRUE	3:173649204-173650560	3:172167339-172167667			NA	TRUE	91
cg01059398	-0.008853384	-0.481573084	chr3	172235808	+	TNFSF10	NM_003810	Body				TRUE					NA	TRUE	92
cg26824216	-0.160472039	-0.582765161	chr3	187086147	-	RTP4	NM_022147	TSS200				NA		3:187085778-187087140			NA	TRUE	93
cg25478614	0.1134933	0.785532175	chr3	187387866	-	SST	NM_001048	Body			RDMR	TRUE	3:188870501-188870889				NA	TRUE	94
cg07110949	0.002657343	0.136598335	chr4	1309878	+	MAEA;MAEA	NM_005882;NM_001017405	Body;Body				NA	4:1299140-1299968	4:1308999-1309983			NA	TRUE	95
cg23239150	0.070538403	0.357678943	chr4	5754217	-	EVC	NM_153717	Body				TRUE		4:5753829-5754778			NA	TRUE	96
cg21254939	0.021571616	-0.479656079	chr4	7657303	-	SORCS2	NM_020777	Body				NA	4:7708095-7708520				NA	TRUE	97
cg23995914	0.140280611	0.617989644	chr4	10459228	+	ZNF518B	NM_053042	TSS200				NA	4:10067138-10068870				NA	TRUE	98
cg23836737	-0.153545428	-0.484101367	chr4	53411703	+							TRUE		4:53411420-53412213			NA	TRUE	99
cg05960024	-0.001021528	0.804350016	chr4	56376020	-	CLOCK	NM_004898	5'UTR				NA					TRUE	TRUE	100
cg10699857	-0.272483609	0.116122513	chr4	111532996	+							TRUE	4:111751653-111752875		chr4:111531932-111533582	chr4:111531536-111534671	NA	TRUE	101
cg05024939	0.182892899	0.660005489	chr4	113442251	+						DMR	TRUE	4:113661328-113662034				NA	TRUE	102
cg05106770	-0.059972415	-0.604294194	chr4	128545193	-							NA					NA	TRUE	103
cg06690548	0.09471733	0.145177104	chr4	139162808	-	SLC7A11	NM_014331	Body				NA					TRUE	TRUE	104
cg02650266	0.028818953	0.354817969	chr4	147558239	+							NA	4:147777501-147778016	4:147557996-147558356			NA	TRUE	105
cg01511232	0.169550787	0.569116015	chr4	155661929	-						RDMR	NA	4:155881196-155881470				NA	TRUE	106
cg25148589	0.078558981	0.642435251	chr4	158141936	+	GRIA2;GRIA2;GRIA2;GRIA2;GRIA2	NM_001083619;NM_000826;NM_001083620;NM_000826;NM_001083619	1stExon;5'UTR;5'UTR;1stExon;5'UTR				NA					TRUE	TRUE	107
cg24843443	0.023702386	-0.677481154	chr4	169402197	+	DDX60L	NM_001012967	TSS1500			RDMR	NA		4:169401084-169402629			NA	TRUE	108
cg03364683	0.036554692	-0.842842022	chr4	169402298	+	DDX60L	NM_001012967	TSS1500			RDMR	NA		4:169401084-169402629			NA	TRUE	109
cg21815258	0.326223519	0.494271286	chr5	1336833	+	CLPTM1L	NM_030782	Body				NA		5:1336735-1336861			NA	TRUE	110
cg12608692	-0.002412844	0.048704299	chr5	16742020	-	MYO10	NM_012334	Body	low-CpG:16795018-16795338			NA					NA	TRUE	111
cg20755989	0.241204089	0.52168724	chr5	28403960	-							TRUE					NA	TRUE	112
cg12238343	0.061944417	0.551990916	chr5	33936402	+	RXFP3	NM_016568	TSS200				TRUE	5:33971926-33974929	5:33936178-33936406			TRUE	TRUE	113
cg02328239	0.16436989	0.710955023	chr5	37837463	-	GDNF	NM_000514	5'UTR				NA	5:37872149-37873835				NA	TRUE	114
cg21878650	-0.128024668	0.065413501	chr5	64558623	+	ADAMTS6	NM_197941	Body				TRUE					NA	TRUE	115
cg26921969	0.395074581	0.761259624	chr5	92948217	-							NA	5:92973835-92974181				NA	TRUE	116
cg10837404	-0.102091213	0.792957551	chr5	112356289	+	DCP2	NM_152624	3'UTR				NA		5:112356259-112356429			NA	TRUE	117
cg01883408	0.210085033	0.535827131	chr5	132083691	+	CCNI2	NM_001039780	Body				NA	5:132110589-132111953	5:132082544-132084072			NA	TRUE	118
cg06448705	0.113571555	0.665009406	chr5	135701094	-	TRPC7;TRPC7;TRPC7;TRPC7;TRPC7;TRPC7	NM_001167576;NM_001167577;NM_020389;NM_001167576;NM_020389;NM_001167577	5'UTR;1stExon;1stExon;1stExon;5'UTR;5'UTR				NA	5:135728942-135729084				NA	TRUE	119
cg16983159	-0.165180675	-0.650810476	chr5	138862441	+	TMEM173	NM_198282	TSS200				NA		5:138861280-138862563			TRUE	TRUE	120
cg08234504	-0.26152552	-0.503010772	chr5	139013317	+							TRUE		5:139013288-139013559	chr5:139012718-139013436	chr5:139009538-139021673	NA	TRUE	121
cg11006267	0.300526161	0.608838805	chr5	139017424	-					chr5:139017086-139017086		TRUE	5:138997178-138998057	5:139017085-139017489			NA	TRUE	122
cg21874213	-0.172139583	-0.148176614	chr5	139229292	-	NRG2;NRG2;NRG2;NRG2	NM_013982;NM_013983;NM_013981;NM_004883	Body;Body;Body;Body				NA		5:139229038-139229453			NA	TRUE	123
cg23500537	0.233705722	0.041365843	chr5	140419819	-						RDMR	NA	5:140400003-140400154				NA	TRUE	124
cg26843711	0.110106802	0.50929932	chr5	140753449	+	PCDHGA4;PCDHGA6;PCDHGA1;PCDHGA5;PCDHGB1;PCDHGA6;PCDHGA3;PCDHGA2;PCDHGB2;PCDHGB3	NM_018917;NM_032086;NM_018912;NM_018918;NM_018922;NM_018919;NM_018916;NM_018915;NM_018923;NM_018924	Body;TSS1500;Body;Body;Body;TSS1500;Body;Body;Body;Body				NA		5:140753248-140753526			NA	TRUE	125
cg08587542	-0.106508873	0.235469347	chr5	141303900	+	KIAA0141;KIAA0141	NM_014773;NM_001142603	Body;Body				NA		5:141302819-141303948	chr5:141302751-141304023	chr5:141300211-141304285	TRUE	TRUE	126
cg10345936	-0.012900832	0.045529142	chr5	150727812	-	SLC36A2	NM_181776	TSS1500				NA					TRUE	TRUE	127
cg16281600	0.047646923	0.703564034	chr5	152869431	-	GRIA1;GRIA1	NM_000827;NM_001114183	TSS1500;TSS1500				NA					NA	TRUE	128
cg03555227	0.191706264	0.44981793	chr5	170289070	-	RANBP17	NM_022897	Body				NA	5:170221317-170222299				NA	TRUE	129
cg14345676	0.001316012	0.744990627	chr5	175109098	+	HRH2;HRH2;HRH2	NM_022304;NM_001131055;NM_022304	5'UTR;5'UTR;1stExon				NA					TRUE	TRUE	130
cg14314729	-0.06706345	-0.358171515	chr5	179815975	-							NA					NA	TRUE	131
cg23517605	-0.07457332	0.663907463	chr6	3228365	+	TUBB2B	NM_178012	TSS1500				NA	6:3172025-3175215	6:3227789-3229687			TRUE	TRUE	132
cg01570885	-0.017483676	-0.300091828	chr6	3849272	-	FAM50B	NM_012135	TSS1500				NA	6:3794161-3795990	6:3848806-3850577			TRUE	TRUE	133
cg23375552	-0.149639186	-0.658759363	chr6	10426310	+						DMR	TRUE	6:10533764-10534879				NA	TRUE	134
cg20052760	-0.087362687	-0.628597809	chr6	10510789	+							TRUE		6:10510346-10511316	chr6:10510505-10511448	chr6:10510502-10511457	NA	TRUE	135
cg16867657	0.895062555	0.790802534	chr6	11044877	+	ELOVL2	NM_017770	TSS1500				NA	6:11151611-11153237	6:11044102-11044892			NA	TRUE	136
cg21572722	0.25892259	0.765388475	chr6	11044894	+	ELOVL2	NM_017770	TSS1500				NA	6:11151611-11153237				NA	TRUE	137
cg00194146	0.025139618	-0.04005416	chr6	13488404	+	GFOD1	NM_018988	TSS1500				NA	6:13594228-13596913				TRUE	TRUE	138
cg01527307	0.150122977	0.538166952	chr6	14500441	+							TRUE			chr6:14499818-14500566	chr6:14499774-14500583	NA	TRUE	139
cg22736354	0.123149986	0.746817388	chr6	18122719	+	NHLRC1	NM_198586	1stExon				TRUE	6:18230230-18231229	6:18122473-18123542	chr6:18121810-18123433	chr6:18121727-18123609	TRUE	TRUE	140
cg10699171	-0.017511895	0.310441101	chr6	24936965	+							TRUE		6:24936899-24937262			NA	TRUE	141
cg06493994	0.194146067	0.777790712	chr6	25652602	-	SCGN;SCGN	NM_006998;NM_006998	1stExon;5'UTR			DMR	NA	6:25760360-25760750	6:25652510-25652746			TRUE	TRUE	142
cg04424621	0.038777571	0.021300365	chr6	27101941	+	HIST1H2BJ	NM_021058	TSS1500				NA					TRUE	TRUE	143
cg02281167	0.050827556	0.478836457	chr6	30140113	-	TRIM15	NM_033229	Body				TRUE	6:30247613-30248242	6:30137754-30140152			NA	TRUE	144
cg03771840	0.063283934	0.494323561	chr6	30140145	-	TRIM15	NM_033229	3'UTR				TRUE	6:30247613-30248242	6:30137754-30140152			NA	TRUE	145
cg06685111	-0.118050369	0.480128582	chr6	30295466	-	HCG18;TRIM39;TRIM39;HCG18;TRIM39	NR_024053;NM_172016;NM_021253;NR_024052;NM_172016	TSS1500;5'UTR;5'UTR;TSS1500;1stExon				NA			chr6:30293319-30295470	chr6:30293080-30295537	NA	TRUE	146
cg06462220	-0.400871124	-0.753898416	chr6	30646756	-	KIAA1949;KIAA1949	NM_001134870;NM_133471	Body;Body				NA		6:30646694-30647418	chr6:30646590-30647389	chr6:30646523-30647610	NA	TRUE	147
cg08420066	-0.008791294	-0.654340158	chr6	30647561	+	KIAA1949;KIAA1949	NM_001134870;NM_133471	Body;Body				TRUE					NA	TRUE	148
cg21467614	-0.041302664	-0.266623229	chr6	31543638	+	TNF	NM_000594	1stExon				NA		6:31543103-31543774			NA	TRUE	149
cg12753631	-0.341572489	-0.57504991	chr6	31566610	-							NA		6:31566327-31566732			NA	TRUE	150
cg18501647	0.016362955	0.781324144	chr6	32117379	-	PRRT1	NM_030651	Body				NA	6:32224481-32225389		chr6:32116128-32117468		NA	TRUE	151
cg04576021	0.190381369	0.481641775	chr6	32784255	-	HLA-DOB	NM_002120	Body				NA			chr6:32781971-32785187	chr6:32783200-32785205	TRUE	TRUE	152
cg10192196	0.103900831	0.119341241	chr6	32812708	+	PSMB8;PSMB8;PSMB8	NM_004159;NM_148919;NM_004159	5'UTR;TSS1500;1stExon				NA	6:32919512-32920687	6:32811563-32813032	chr6:32811056-32812903	chr6:32810228-32817254	NA	TRUE	153
cg18468088	0.271258499	0.632283615	chr6	35490818	+							NA	6:35598722-35598799	6:35490071-35491793			NA	TRUE	154
cg03894990	0.001522808	-0.719295424	chr6	44309765	+	SPATS1	NM_145026	TSS1500				NA				chr6:44309731-44310661	NA	TRUE	155
cg01740766	-0.048108887	-0.61822496	chr6	44528958	+							NA	6:44636936-44637136				NA	TRUE	156
cg16255583	-0.180263541	-0.646236942	chr6	72220122	+							TRUE		6:72219689-72220338			NA	TRUE	157
cg04642300	0.000163032	-0.504872186	chr6	109288592	-	ARMC2	NM_032131	Body		chr6:109288163-109288163		TRUE					NA	TRUE	158
cg17266282	-0.042249296	0.217395249	chr6	112294532	-					chr6:112294288-112294288		TRUE		6:112294275-112294767			NA	TRUE	159
cg07095347	-0.022007791	-0.716645345	chr6	133253256	-							TRUE					NA	TRUE	160
cg00073460	0.059375867	-0.625597046	chr6	149806502	+	ZC3H12D	NM_207360	TSS1500				NA		6:149805583-149806902			NA	TRUE	161
cg16333846	0.226865753	0.702578943	chr6	155538155	+	TIAM2;TIAM2;TIAM2	NM_001010927;NM_012454;NM_001010927	1stExon;Body;5'UTR				NA					NA	TRUE	162
cg13221458	-0.03948023	-0.566484052	chr6	160112632	-	SOD2;SOD2;SOD2	NM_001024466;NM_000636;NM_001024465	Body;Body;Body			RDMR	NA		6:160112117-160112680	chr6:160111738-160112669	chr6:160100471-160115872	NA	TRUE	163
cg05468948	0.1385783	0.290100523	chr6	166078832	-							NA	6:165998803-165998845				NA	TRUE	164
cg00795927	-0.066373448	0.258902096	chr7	640603	-	PRKAR1B;PRKAR1B;PRKAR1B;PRKAR1B;PRKAR1B;PRKAR1B	NM_001164759;NM_001164762;NM_001164758;NM_001164760;NM_001164761;NM_002735	Body;Body;Body;Body;Body;Body				NA	7:607112-607567			chr7:639906-646133	NA	TRUE	165
cg08911208	-0.094222318	-0.344929639	chr7	1025760	-	CYP2W1	NM_017781	Body				NA	7:992286-992352				NA	TRUE	166
cg22372849	-0.140115536	-0.674519183	chr7	1501248	-					chr7:1501148-1501148		NA		7:1501187-1502054			NA	TRUE	167
cg16012294	0.139311157	0.525888815	chr7	2151681	-	MAD1L1;MAD1L1;MAD1L1	NM_003550;NM_001013837;NM_001013836	Body;Body;Body				NA	7:2118207-2118315		chr7:2148209-2152993		NA	TRUE	168
cg22679120	-0.040224477	0.538947846	chr7	2353402	+	SNX8	NM_013321	Body				NA		7:2353381-2354677			TRUE	TRUE	169
cg13931228	-0.248553517	-0.15959432	chr7	24612418	+	MPP6	NM_016447	TSS1500				NA					TRUE	TRUE	170
cg27009703	-0.177740737	-0.361706046	chr7	27204894	+	HOXA9	NM_152739	1stExon			DMR	NA	7:27169827-27171776				TRUE	TRUE	171
cg11671968	0.12056816	0.467983987	chr7	30063078	-	FKBP14	NM_017946	Body				NA					NA	TRUE	172
cg26312920	0.006822853	0.105282446	chr7	31380390	-	NEUROD6;NEUROD6	NM_022728;NM_022728	5'UTR;1stExon				NA					TRUE	TRUE	173
cg19663246	-0.038644462	-0.553756517	chr7	32339095	-							NA					NA	TRUE	174
cg14396995	0.124112592	0.462934621	chr7	42278089	+	GLI3	NM_000168	TSS1500				NA	7:42242529-42244622				NA	TRUE	175
cg18442362	0.006510407	0.463379401	chr7	44677772	+	OGDH;OGDH;OGDH	NM_001003941;NM_001165036;NM_002541	Body;Body;Body		chr7:44677628-44677628		TRUE		7:44677683-44678307			NA	TRUE	176
cg09748749	-0.202802695	-0.713472665	chr7	65540429	+	ASL;ASL;ASL;ASL	NM_001024944;NM_001024943;NM_001024946;NM_000048	TSS1500;TSS1500;TSS1500;TSS1500				NA		7:65540308-65541919			NA	TRUE	177
cg20692569	0.031358837	0.799704503	chr7	72848481	+	FZD9	NM_003508	1stExon				NA	7:72485870-72487968	7:72847767-72848786			TRUE	TRUE	178
cg23857078	0.234566322	0.163056274	chr7	87975315	+							TRUE					NA	TRUE	179
cg21743182	0.002840957	0.713909682	chr7	90339132	+	CDK14	NM_012395	Body				TRUE					NA	TRUE	180
cg09436502	0.056326271	-0.757858756	chr7	95226433	+	PDK4	NM_002612	TSS1500				TRUE			chr7:95225152-95226484	chr7:95215811-95226992	NA	TRUE	181
cg00503840	0.048660992	-0.576387213	chr7	96650509	+	DLX5	NM_005221	Body				NA	7:96488337-96489561	7:96649922-96650536			TRUE	TRUE	182
cg04084157	0.358752386	0.243732089	chr7	100809049	+	VGF	NM_003378	TSS200				NA	7:100594926-100596772	7:100808711-100809141			TRUE	TRUE	183
cg14175438	-0.068289683	-0.592900543	chr7	121036729	+	FAM3C;FAM3C	NM_014888;NM_001040020	TSS1500;TSS1500				NA		7:121035400-121037180			TRUE	TRUE	184
cg20665157	0.007167281	0.391882366	chr7	121969421	-	CADPS2;CADPS2;CADPS2	NM_001009571;NM_001167940;NM_017954	Body;Body;Body				TRUE					NA	TRUE	185
cg21184711	0.095030843	0.335707634	chr7	122488330	+	CADPS2;CADPS2;CADPS2	NM_001009571;NM_001167940;NM_017954	Body;Body;Body				TRUE					NA	TRUE	186
cg02383785	0.184785161	0.514108705	chr7	127808848	+							NA		7:127808490-127809067			NA	TRUE	187
cg04528819	0.034464913	0.654541443	chr7	130418315	-	KLF14	NM_138693	1stExon				NA	7:130068467-130069793				TRUE	TRUE	188
cg20426994	-0.10138815	0.581268168	chr7	130418324	-	KLF14	NM_138693	1stExon			DMR	NA	7:130068467-130069793				NA	TRUE	189
cg08097417	0.871371912	0.631151609	chr7	130419133	-	KLF14	NM_138693	TSS1500				NA	7:130068467-130069793	7:130418325-130419878			NA	TRUE	190
cg02821342	-0.238319555	-0.865699617	chr7	130793551	+	MKLN1;FLJ43663	NM_001145354;NR_015431	TSS1500;Body				NA		7:130793420-130793675			NA	TRUE	191
cg20397034	-0.243166838	-0.760195306	chr7	130794584	+	MKLN1;FLJ43663	NM_001145354;NR_015431	TSS1500;TSS1500				NA		7:130794342-130795249	chr7:130794180-130796549	chr7:130786861-130797567	NA	TRUE	192
cg03473532	-0.212957707	-0.666645836	chr7	131008743	-	MKLN1	NM_001145354	Body				NA		7:131008672-131009115			NA	TRUE	193
cg08280936	-0.236131315	-0.01738279	chr7	148981586	+	ZNF783	NR_015357	Body				TRUE		7:148981253-148982889			NA	TRUE	194
cg08540945	-0.169692254	0.381904626	chr7	152591698	+							NA	7:152222028-152222744	7:152590901-152592150			NA	TRUE	195
cg18769120	0.061912688	0.479744356	chr7	155162662	+							NA			chr7:155161616-155163001		NA	TRUE	196
cg26101086	-0.157277248	0.214558794	chr8	1851026	+	ARHGEF10	NM_014629	Body				NA	8:1838227-1838434				NA	TRUE	197
cg19859445	0.187400893	0.629232101	chr8	19588125	-							TRUE					NA	TRUE	198
cg07502389	0.315775924	0.720425438	chr8	24771259	+	NEFM;NEFM	NM_005382;NM_001105541	TSS200;TSS1500	high-CpG:24827142-24827330			NA	8:24826833-24828475	8:24771076-24771368			NA	TRUE	199
cg18267374	-0.211900555	0.588329104	chr8	24771273	+	NEFM;NEFM;NEFM	NM_001105541;NM_005382;NM_005382	TSS1500;5'UTR;1stExon	high-CpG:24827142-24827330			NA	8:24826833-24828475	8:24771076-24771368			TRUE	TRUE	200
cg00582628	0.020113023	0.468405516	chr8	54764515	-	RGS20	NM_170587	1stExon				NA				chr8:54763600-54764665	TRUE	TRUE	201
cg16419235	0.114778824	0.523233864	chr8	57360613	-	PENK	NM_001135690	TSS1500		chr8:57360424-57360424		NA	8:57522950-57523369	8:57360377-57362115			NA	TRUE	202
cg23710218	-0.349167653	0.423622948	chr8	72756656	+	MSC;MSC	NM_005098;NM_005098	1stExon;5'UTR	high-CpG:72918551-72919262			NA	8:72918070-72919559	8:72756604-72757097			TRUE	TRUE	203
cg07583137	0.045566547	0.557111788	chr8	82644012	-	CHMP4C	NM_152284	TSS1500				NA			chr8:82643988-82645354	chr8:82642401-82645384	NA	TRUE	204
cg12402251	0.126795101	0.375118538	chr8	91094811	+	CALB1	NM_004929	Body				NA	8:91163987-91164262		chr8:91094699-91095373	chr8:91093564-91095971	TRUE	TRUE	205
cg19497517	-0.043395521	-0.496552945	chr8	145028257	+	PLEC1;PLEC1;PLEC1	NM_000445;NM_201378;NM_201379	Body;Body;TSS200				NA	8:145099465-145100338				NA	TRUE	206
cg13586038	0.123252118	0.63072381	chr9	2044055	+	SMARCA2;SMARCA2	NM_139045;NM_003070	Body;Body				NA					NA	TRUE	207
cg19724470	-0.10071878	-0.431917546	chr9	5450936	+	CD274	NM_014143	5'UTR				NA		9:5449680-5451039			TRUE	TRUE	208
cg07211259	-0.005379403	0.268545093	chr9	5510497	-	PDCD1LG2	NM_025239	TSS200				NA		9:5510455-5510927			TRUE	TRUE	209
cg07158339	-0.031781561	-0.364962697	chr9	71650237	-	FXN;FXN;FXN	NM_000144;NM_001161706;NM_181425	TSS1500;TSS1500;TSS1500				NA				chr9:71650167-71652726	TRUE	TRUE	210
cg24046474	0.273014681	0.411467812	chr9	130212550	+	RPL12;LRSAM1;LRSAM1	NM_000976;NM_138361;NM_001005373	Body;TSS1500;TSS1500				NA					TRUE	TRUE	211
cg14059835	-0.01606536	-0.798706739	chr9	132598917	-	C9orf78;USP20;USP20;USP20	NM_016520;NM_001110303;NM_001008563;NM_006676	TSS1500;5'UTR;5'UTR;5'UTR				NA		9:132596735-132599292			NA	TRUE	212
cg10570177	-0.098633561	-0.041338211	chr9	136324586	+	C9orf7;C9orf7	NM_017586;NM_001135775	TSS1500;TSS1500				NA	9:135314398-135315571		chr9:136323712-136327735	chr9:136324325-136326708	TRUE	TRUE	213
cg13649056	0.039138961	0.669204998	chr9	136474626	-							NA	9:135463992-135464726	9:136474269-136474939			NA	TRUE	214
cg13734401	-0.095656068	-0.743609542	chr9	138881660	-							NA		9:138881239-138882787	chr9:138880483-138886672		NA	TRUE	215
cg26581729	0.020094806	-0.690040905	chr9	139939792	+	NPDC1	NM_015392	Body				NA					TRUE	TRUE	216
cg06231995	0.474820936	0.345748185	chr9	140024593	-							NA	9:139143349-139144831				NA	TRUE	217
cg14411282	-0.257289082	-0.028268721	chr9	140476961	-	ZMYND19	NM_138462	3'UTR				NA	9:139596622-139596935	9:140476223-140477172			NA	TRUE	218
cg12530994	-0.229184375	-0.522794065	chr10	5136782	+	AKR1C3	NM_003739	Body				TRUE		10:5136410-5137165			NA	TRUE	219
cg23754392	-0.291911388	-0.83594812	chr10	22611454	+	BMI1	NM_005180	5'UTR			RDMR	NA					NA	TRUE	220
cg06908778	-0.157690767	0.203961411	chr10	22634602	-	SPAG6;SPAG6	NM_012443;NM_172242	Body;Body				NA	10:22674047-22675003	10:22633823-22635248			TRUE	TRUE	221
cg22796704	-0.029759398	0.534817615	chr10	49673534	+	ARHGAP22	NM_021226	Body				NA					NA	TRUE	222
cg01560871	-0.049569159	-0.664310386	chr10	72545424	+	C10orf27	NM_152710	TSS1500				NA					TRUE	TRUE	223
cg04268405	-0.131067658	0.08215091	chr10	73723221	-	CHST3	NM_004273	TSS1500				NA					TRUE	TRUE	224
cg18738190	-0.107287066	-0.690527207	chr10	73740291	+	CHST3	NM_004273	5'UTR				TRUE					NA	TRUE	225
cg04126866	-0.002395993	0.750056062	chr10	85932763	-	C10orf99	NM_207373	TSS1500				NA					TRUE	TRUE	226
cg25427880	0.163755938	0.39380687	chr10	102322128	-							TRUE	10:102311823-102312692	10:102321573-102323327	chr10:102321542-102323648	chr10:102319765-102327738	NA	TRUE	227
cg09671951	0.100547105	-0.718018982	chr10	104556332	-	C10orf26;C10orf26	NM_017787;NM_001083913	Body;Body		chr10:104556220-104556220		TRUE		10:104556142-104556517			NA	TRUE	228
cg06888746	0.06636353	0.269164425	chr10	105517764	+	SH3PXD2A	NM_014631	Body				TRUE					NA	TRUE	229
cg24838825	0.064357741	-0.597140638	chr10	111693923	+							TRUE		10:111693658-111694079			NA	TRUE	230
cg13848598	0.193738927	0.479752039	chr10	115804578	+	ADRB1	NM_000684	1stExon				NA	10:115792700-115795458				NA	TRUE	231
cg07906193	-0.028845261	-0.524209509	chr10	126599966	-							TRUE					NA	TRUE	232
cg12776156	-0.178994003	-0.444973994	chr11	848044	+	TSPAN4;TSPAN4;TSPAN4;TSPAN4;TSPAN4;TSPAN4;TSPAN4	NM_001025236;NM_001025239;NM_001025238;NM_001025235;NM_003271;NM_001025237;NM_001025234	5'UTR;5'UTR;5'UTR;5'UTR;5'UTR;5'UTR;5'UTR				TRUE			chr11:841900-852166		NA	TRUE	233
cg05928581	-0.042510449	0.518421239	chr11	1885097	-	LSP1	NM_002339	Body				TRUE		11:1884850-1885143	chr11:1883051-1900297	chr11:1882552-1895331	NA	TRUE	234
cg17627559	-0.041485942	-0.760554176	chr11	2323896	+	TSPAN32;C11orf21;C11orf21	NM_139022;NR_024621;NM_001142946	Body;TSS1500;TSS1500				NA					TRUE	TRUE	235
cg23091758	0.105288037	0.396943089	chr11	9025767	-	NRIP3	NM_020645	TSS200			DMR	NA	11:8981699-8983012		chr11:9024449-9026520	chr11:9024405-9026436	NA	TRUE	236
cg04940570	0.289083267	0.552276367	chr11	12696758	-	TEAD1	NM_021961	5'UTR				NA	11:12651991-12653557	11:12695339-12696865			NA	TRUE	237
cg10825530	-0.032291929	0.586503567	chr11	16023708	-	SOX6;SOX6;SOX6;SOX6	NM_033326;NM_001145819;NM_017508;NM_001145811	Body;Body;Body;Body				TRUE					NA	TRUE	238
cg20654468	-0.053720029	-0.757949928	chr11	58342997	-	LPXN;LPXN	NM_001143995;NM_004811	Body;Body			RDMR	NA					TRUE	TRUE	239
cg26552743	0.143274678	-0.010279284	chr11	58826414	-							NA		11:58825464-58826892	chr11:58825247-58827111	chr11:58825537-58826492	NA	TRUE	240
cg21992250	0.148220328	0.213596917	chr11	60718709	-	SLC15A3;SLC15A3	NM_016582;NR_027391	1stExon;Body				TRUE	11:60475047-60475609	11:60718685-60719343			TRUE	TRUE	241
cg15015340	-0.177069064	-0.170780279	chr11	61486220	+	DAGLA	NM_006133	5'UTR				TRUE					NA	TRUE	242
cg22843803	0.056493693	0.55801048	chr11	65196125	+				low-CpG:64952070-64953288			TRUE					NA	TRUE	243
cg02532488	-0.700325684	-0.477992976	chr11	65343341	-	EHBP1L1	NM_001099409	TSS200				NA	11:65099396-65100394	11:65343025-65343789			NA	TRUE	244
cg13547237	-0.244821395	0.144260606	chr11	65687877	-	C11orf68;DRAP1;C11orf68	NM_031450;NM_006442;NM_001135635	TSS1500;Body;TSS1500				NA					TRUE	TRUE	245
cg06419846	0.173053972	0.19340263	chr11	66083697	+	CD248	NM_020404	1stExon				NA	11:65840060-65841164				NA	TRUE	246
cg05496363	0.052685055	0.357829396	chr11	66083766	+	CD248	NM_020404	1stExon				NA	11:65840060-65841164				NA	TRUE	247
cg20063906	-0.059773403	-0.604774497	chr11	85929769	+							TRUE		11:85928898-85930013			NA	TRUE	248
cg12328429	0.084155006	0.311229166	chr11	86350134	-	ME3;ME3;ME3	NM_006680;NM_001161586;NM_001014811	Body;Body;Body				TRUE					NA	TRUE	249
cg25969122	-0.230844144	-0.256552868	chr11	119630362	+						DMR	NA					NA	TRUE	250
cg18633600	0.258223734	0.703202489	chr12	1940452	+	LRTM2;LRTM2;CACNA2D4;LRTM2	NM_001163925;NM_001039029;NM_172364;NM_001163926	Body;Body;Body;Body				TRUE	12:1810610-1810818	12:1939931-1940497			NA	TRUE	251
cg08622677	0.228243806	0.597781694	chr12	3601306	-	PRMT8	NM_019854	Body				NA	12:3471427-3472462	12:3601232-3601900			NA	TRUE	252
cg01820374	0.122892482	-0.814579799	chr12	6882083	-	LAG3	NM_002286	Body				TRUE		12:6881253-6882742			TRUE	TRUE	253
cg25719851	-0.022925595	0.313740726	chr12	7055452	-	PTPN6	NM_080548	TSS1500				NA		12:7055221-7055846			NA	TRUE	254
cg13828440	0.007369907	0.321406678	chr12	10459972	-	KLRD1;KLRD1;KLRD1	NM_002262;NM_001114396;NM_007334	TSS1500;5'UTR;TSS1500				NA					NA	TRUE	255
cg26986871	0.056829639	-0.702074063	chr12	10545083	-							NA					NA	TRUE	256
cg00748589	0.166719656	0.802080124	chr12	11653486	-							NA	12:11544500-11545229	12:11653353-11654101			NA	TRUE	257
cg21747310	-0.14214148	-0.055425958	chr12	11709115	-							TRUE		12:11708676-11709285			NA	TRUE	258
cg00431549	8.83E-06	-0.779835327	chr12	15039025	-	MGP	NM_000900	TSS200				NA					TRUE	TRUE	259
cg13302154	0.108000163	0.419981073	chr12	15039432	-	MGP	NM_000900	TSS1500				NA					TRUE	TRUE	260
cg13909661	-0.274041919	0.010614531	chr12	26386833	-	SSPN;SSPN	NM_005086;NM_001135823	3'UTR;3'UTR				NA					NA	TRUE	261
cg19722847	-0.181925615	0.121525073	chr12	30849114	+	IPO8	NM_006390	TSS1500				NA	12:30739425-30740382				TRUE	TRUE	262
cg26311454	0.122618743	0.338662099	chr12	49520648	-							NA					NA	TRUE	263
cg08900043	-0.061964424	-0.199381117	chr12	54378896	-	HOXC10	NM_017409	TSS200				TRUE	12:52664091-52666678	12:54378609-54379139			TRUE	TRUE	264
cg00753885	-0.478311288	-0.232507876	chr12	57401797	-							TRUE			chr12:57401779-57402339	chr12:57401431-57403147	NA	TRUE	265
cg18573383	0.181171156	0.434712552	chr12	75603401	-	KCNC2;KCNC2;KCNC2;KCNC2;KCNC2;KCNC2	NM_153748;NM_139137;NM_153748;NM_139137;NM_139136;NM_139136	1stExon;1stExon;5'UTR;5'UTR;1stExon;5'UTR				NA					TRUE	TRUE	266
cg15405572	0.037353229	-0.725921026	chr12	78224552	+	NAV3	NM_014903	TSS1500				NA					NA	TRUE	267
cg01528542	-0.142372036	-0.523300696	chr12	81468232	+							NA					NA	TRUE	268
cg08993878	-0.064338662	-0.42842532	chr12	98151379	-							NA					NA	TRUE	269
cg22827210	-0.027255117	-0.07592411	chr12	104998182	-	CHST11	NM_018413	Body		chr12:104997803-104997803		TRUE		12:104997905-104998295			NA	TRUE	270
cg03670162	-0.272548779	-0.521182884	chr12	108297339	-							NA			chr12:108296935-108297983	chr12:108296586-108298150	NA	TRUE	271
cg04596060	-0.665424984	-0.47195749	chr12	114404600	+	RBM19;RBM19;RBM19	NM_001146699;NM_016196;NM_001146698	TSS1500;TSS1500;TSS1500				NA		12:114403527-114405075			NA	TRUE	272
cg21907579	-0.177227446	0.143040542	chr12	114845868	+	TBX5;TBX5;TBX5;TBX5	NM_080717;NM_000192;NM_000192;NM_080717	1stExon;1stExon;5'UTR;5'UTR				TRUE	12:113330245-113330601				TRUE	TRUE	273
cg10281002	0.025872001	0.108903849	chr12	114846399	-	TBX5;TBX5	NM_080717;NM_000192	TSS200;TSS200				TRUE	12:113330670-113330960				TRUE	TRUE	274
cg07172885	0.117264072	0.486411633	chr12	133757907	-	ZNF268;ZNF268;ZNF268;ZNF268;ZNF268;ZNF268;ZNF268;ZNF268;ZNF268	NM_001165886;NM_001165885;NM_001165887;NM_001165882;NM_001165883;NM_003415;NM_001165884;NM_001165881;NM_152943	TSS200;TSS200;TSS200;TSS200;TSS200;TSS200;TSS200;TSS200;TSS200				NA		12:133757713-133758803			NA	TRUE	275
cg20404336	0.157368981	0.406834096	chr12	133757909	+	ZNF268;ZNF268;ZNF268;ZNF268;ZNF268;ZNF268;ZNF268;ZNF268;ZNF268	NM_001165886;NM_001165885;NM_001165887;NM_001165882;NM_001165883;NM_003415;NM_001165884;NM_001165881;NM_152943	TSS200;TSS200;TSS200;TSS200;TSS200;TSS200;TSS200;TSS200;TSS200				NA	12:132267982-132268428	12:133757713-133758803			NA	TRUE	276
cg18582260	0.035026458	-0.686157809	chr13	25085301	-	PARP4	NM_006437	5'UTR				NA	13:23983282-23983406	13:25085164-25085973			NA	TRUE	277
cg22179082	0.002964856	0.118028241	chr13	27334259	+	GPR12	NM_005288	5'UTR			CDMR	NA	13:26232227-26233192				TRUE	TRUE	278
cg06648759	0.426865378	0.750433736	chr13	40892751	-							TRUE					NA	TRUE	279
cg23357533	-0.315330856	0.317919851	chr13	42044673	+	C13orf15	NM_014059	3'UTR				NA					NA	TRUE	280
cg20102280	-0.062042567	-0.761014124	chr13	47470793	+	HTR2A;HTR2A	NM_000621;NM_001165947	5'UTR;Body				NA					NA	TRUE	281
cg13767001	0.083143352	-0.242472764	chr13	53383727	-	MIR759	NR_031582	TSS1500				NA		13:53383493-53383728			NA	TRUE	282
cg23389651	-0.293553057	-0.65227264	chr13	95327390	+							TRUE		13:95327139-95328117			NA	TRUE	283
cg09646392	-0.033184175	-0.7180686	chr13	108921052	+	TNFSF13B;TNFSF13B	NM_006573;NM_001145645	TSS1500;TSS1500				NA			chr13:108920956-108921526	chr13:108920701-108923500	TRUE	TRUE	284
cg00593462	0.097570402	0.385256719	chr13	110768493	-							NA	13:109566471-109566685	13:110767525-110769072			NA	TRUE	285
cg07115626	-0.094763614	-0.334126268	chr14	38071285	-							NA	14:37141012-37141175				NA	TRUE	286
cg06738602	-0.094900868	-0.51489196	chr14	52780634	-	PTGER2	NM_000956	TSS1500			RDMR	NA	14:51850357-51851839	14:52780194-52781043			TRUE	TRUE	287
cg03032497	0.111167257	-0.240120519	chr14	61108227	-						RDMR	TRUE	14:60177929-60179820				NA	TRUE	288
cg18771300	-0.020048513	-0.283613744	chr14	63671737	+	RHOJ	NM_020663	1stExon				TRUE					TRUE	TRUE	289
cg24058132	-0.112975227	-0.181320731	chr14	88459866	+	GALC;GALC;GALC;GALC	NM_001037525;NM_001037525;NM_000153;NM_000153	1stExon;5'UTR;1stExon;5'UTR				NA		14:88458645-88460171			TRUE	TRUE	290
cg13027206	-0.045902277	-0.50548696	chr14	91866325	-	CCDC88C	NM_001080414	Body			DMR	NA		14:91866155-91866847			NA	TRUE	291
cg15480367	0.194531027	0.799991841	chr14	93389485	+	CHGA;CHGA	NM_001275;NM_001275	5'UTR;1stExon	high-CpG:92459197-92459251			NA	14:92459031-92459802				NA	TRUE	292
cg12177001	-0.07785388	0.505421113	chr14	94576148	-	IFI27;IFI27	NM_001130080;NM_005532	TSS1500;TSS1500				NA					TRUE	TRUE	293
cg23709172	-0.186107442	-0.563889106	chr14	100763736	+	SLC25A29	NM_001039355	Body				TRUE		14:100763625-100763853			NA	TRUE	294
cg14334310	-0.046881748	-0.350212141	chr14	103558502	-							NA		14:103556994-103558768			NA	TRUE	295
cg04875128	0.000358099	0.764376056	chr15	31775895	-	OTUD7A	NM_130901	Body				NA	15:29562601-29564280				NA	TRUE	296
cg21296230	-0.025400229	0.571378823	chr15	33010536	-	GREM1	NM_013372	5'UTR				NA	15:30796823-30799072				TRUE	TRUE	297
cg02071305	0.006551842	0.464017837	chr15	41185973	-	VPS18	NM_020857	TSS1500				NA	15:38972993-38973297				TRUE	TRUE	298
cg03361973	0.060347983	0.716188925	chr15	48028752	+	SEMA6D;SEMA6D;SEMA6D;SEMA6D;SEMA6D;SEMA6D	NM_153619;NM_153616;NM_024966;NM_153617;NM_020858;NM_153618	5'UTR;5'UTR;5'UTR;5'UTR;5'UTR;5'UTR				TRUE					NA	TRUE	299
cg16717122	0.145165276	0.693323279	chr15	51973920	-	SCG3;SCG3;SCG3;SCG3	NM_001165257;NM_013243;NM_013243;NM_001165257	5'UTR;1stExon;5'UTR;1stExon				NA	15:49760868-49761292		chr15:51973490-51974053	chr15:51972955-51974466	NA	TRUE	300
cg04858164	0.021061771	-0.590893456	chr15	57324333	+	TCF12;TCF12;TCF12;TCF12	NM_003205;NM_207037;NM_207036;NM_207038	Body;Body;Body;Body				TRUE					NA	TRUE	301
cg25005357	0.175415186	0.34409509	chr15	57426631	+	TCF12;TCF12;TCF12;TCF12	NM_003205;NM_207037;NM_207036;NM_207038	Body;Body;Body;Body				TRUE			chr15:57426465-57426759		NA	TRUE	302
cg08454546	-0.094942525	0.289659608	chr15	59731340	+	FAM81A	NM_152450	5'UTR				NA	15:57518600-57518639				NA	TRUE	303
cg21801378	-0.108999297	0.441731268	chr15	72612125	-	BRUNOL6	NM_052840	1stExon				NA	15:70399042-70400040	15:72611781-72613209			TRUE	TRUE	304
cg15188939	0.204901746	0.518154289	chr15	72809154	+	ARIH1	NM_005744	Body				TRUE					NA	TRUE	305
cg20540209	0.168253736	-0.19434485	chr15	76633981	+	ISL2	NM_145805	Body				TRUE	15:74419573-74421330				NA	TRUE	306
cg05542681	0.136880027	0.558177265	chr16	744328	-	FBXL16	NM_153350	Body				NA	16:683511-685944				NA	TRUE	307
cg08949164	0.26484193	0.343035191	chr16	1383433	+	BAIAP3	NM_003933	TSS1500				NA	16:1322918-1324699				NA	TRUE	308
cg09183146	0.073150402	0.650062992	chr16	1429863	+	UNKL	NM_023076	TSS200				NA	16:1369016-1370105	16:1428912-1430497			NA	TRUE	309
cg00454305	0.104795616	0.761317	chr16	1429905	-	UNKL	NM_023076	TSS1500				NA	16:1369016-1370105	16:1428912-1430497			NA	TRUE	310
cg02871659	0.088545773	0.487710939	chr16	2014063	+	SNHG9;SNORA64;SNORA78;RPS2	NR_003142;NR_002326;NR_003020;NM_002952	TSS1500;TSS1500;TSS1500;Body				NA	16:1953833-1955584				NA	TRUE	311
cg00991848	0.443892891	0.016417821	chr16	2014270	+	SNHG9;SNORA64;SNORA78;RPS2	NR_003142;NR_002326;NR_003020;NM_002952	TSS1500;TSS1500;TSS1500;Body				NA	16:1953833-1955584				NA	TRUE	312
cg02331561	-0.251920782	-0.078480273	chr16	2391081	+	ABCA17P;ABCA3	NR_003574;NM_001089	Body;TSS1500				NA	16:2329636-2332165	16:2390621-2391210			TRUE	TRUE	313
cg26974444	0.076079047	0.591546557	chr16	12214807	+	SNX29	NM_001080530	Body				TRUE					NA	TRUE	314
cg06112560	0.164151085	0.477322885	chr16	23691827	+	PLK1	NM_005030	Body				TRUE					NA	TRUE	315
cg10917602	-0.01541014	0.616622583	chr16	30996630	-	HSD3B7;HSD3B7;HSD3B7	NM_025193;NM_001142778;NM_001142777	5'UTR;5'UTR;5'UTR				NA		16:30995842-30996942	chr16:30993861-30998633	chr16:30993986-30997762	TRUE	TRUE	316
cg09155044	-0.34067138	-0.599392971	chr16	31106785	+	VKORC1;VKORC1	NM_206824;NM_024006	TSS1500;TSS1500				NA				chr16:31105288-31107684	NA	TRUE	317
cg04031656	0.054786257	0.644402636	chr16	53091688	+	CHD9	NM_025134	5'UTR				NA		16:53091660-53091814			NA	TRUE	318
cg03746976	-0.057713285	-0.627257715	chr16	58035805	-	C16orf57	NM_024598	Body				NA		16:58034030-58036150			NA	TRUE	319
cg18693704	-0.281443943	0.163659884	chr16	66731313	+	CMTM4;CMTM4	NM_178818;NM_181521	TSS1500;TSS1500				NA					TRUE	TRUE	320
cg00658652	0.152610423	0.485091113	chr16	71500215	-							NA					NA	TRUE	321
cg03991512	-0.076313755	0.147940214	chr16	75150456	-	LDHD;LDHD	NM_194436;NM_153486	Body;Body				NA			chr16:75149924-75150985	chr16:75142382-75150971	TRUE	TRUE	322
cg22947000	0.022123113	0.383403956	chr16	81272281	-	BCMO1	NM_017429	TSS200				TRUE					TRUE	TRUE	323
cg07082267	-0.469183318	0.501994065	chr16	85429035	-					chr16:85428961-85428961		TRUE					NA	TRUE	324
cg03486383	0.163455361	0.48978546	chr16	87865062	-	SLC7A5	NM_003486	3'UTR				NA	16:86422286-86422615		chr16:87861660-87867422	chr16:87859991-87893573	NA	TRUE	325
cg02228185	-0.040322638	0.169661315	chr17	3379567	+	ASPA;ASPA	NM_000049;NM_001128085	1stExon;Body				TRUE					TRUE	TRUE	326
cg23668631	0.005436849	-0.543314051	chr17	3796936	-	CAMKK1;CAMKK1	NM_032294;NM_172207	TSS1500;TSS1500				NA			chr17:3789877-3798921	chr17:3790017-3798957	TRUE	TRUE	327
cg14522800	0.130623663	0.465291773	chr17	4648566	-	ZMYND15;ZMYND15	NM_001136046;NM_032265	Body;Body				NA	17:4595265-4595432	17:4648361-4648628			NA	TRUE	328
cg25135555	0.19289556	0.598827853	chr17	9832474	-	GAS7;GAS7;GAS7;GAS7	NM_201432;NM_001130831;NM_201433;NM_003644	Body;Body;Body;Body				NA		17:9831134-9832693			NA	TRUE	329
cg13029847	0.647782172	0.226658378	chr17	27333273	+	SEZ6;SEZ6	NM_178860;NM_001098635	TSS200;TSS200				NA		17:27332677-27333501			NA	TRUE	330
cg06144905	0.159584367	-0.399337717	chr17	27369780	+	PIPOX	NM_016518	TSS200				NA					TRUE	TRUE	331
cg11896923	0.03762834	-0.784890896	chr17	37825027	+	PNMT	NM_002686	Body				NA		17:37823370-37825208			TRUE	TRUE	332
cg06874016	-0.087728359	-0.162559179	chr17	40177415	+	NKIRAS2;NKIRAS2;NKIRAS2;NKIRAS2;NKIRAS2	NM_001144927;NM_001144928;NM_017595;NM_001144929;NM_001001349	3'UTR;3'UTR;3'UTR;3'UTR;3'UTR				NA		17:40176771-40177869			NA	TRUE	333
cg25809905	-0.098070008	-0.689243263	chr17	42467728	+	ITGA2B	NM_000419	TSS1500				NA					TRUE	TRUE	334
cg04267101	-0.019686613	-0.729216473	chr17	48619037	-	EPN3	NM_017957	Body				TRUE		17:48618647-48620579			NA	TRUE	335
cg22507023	0.238758635	0.015651796	chr17	55946195	-	CUEDC1	NM_017949	Body				TRUE		17:55945132-55946227			NA	TRUE	336
cg02867102	-0.119891936	-0.430956329	chr17	62398693	+							NA	17:59752099-59752445	17:62397669-62399390			NA	TRUE	337
cg13093111	0.008813891	0.20596119	chr17	66308577	-	ARSG	NM_014960	Body				TRUE			chr17:66308205-66309218	chr17:66308512-66309422	NA	TRUE	338
cg13683374	-0.082641119	-0.663651767	chr17	72364767	-	GPR142	NM_181790	Body				TRUE		17:72363777-72365851			NA	TRUE	339
cg10644544	-0.667740113	-0.067049734	chr17	73872584	+	TRIM47	NM_033452	Body				TRUE		17:73872183-73872679			NA	TRUE	340
cg03643998	-0.096155832	-0.761169904	chr17	77042455	-	C1QTNF1;C1QTNF1;C1QTNF1	NM_198594;NM_030968;NM_198593	5'UTR;Body;Body				NA	17:74553910-74554094	17:77041744-77042673	chr17:77040991-77043231	chr17:77041271-77043340	NA	TRUE	341
cg11620135	-0.017903185	0.719669874	chr17	79011140	-	BAIAP2;BAIAP2;BAIAP2;BAIAP2	NM_017450;NM_006340;NM_001144888;NM_017451	Body;Body;Body;Body				NA	17:76625310-76625758	17:79011109-79011485			NA	TRUE	342
cg25436157	-0.104484131	-0.417172716	chr18	21018562	-	C18orf45	NM_032933	TSS1500				NA		18:21017229-21018877			NA	TRUE	343
cg24217948	-0.064571004	-0.585283451	chr18	42261980	-	SETBP1;SETBP1	NM_001130110;NM_015559	5'UTR;5'UTR			RDMR	TRUE				chr18:42258463-42264558	NA	TRUE	344
cg17589341	0.057342287	0.117662601	chr18	43304079	+	SLC14A1;SLC14A1;SLC14A1	NM_015865;NM_001146036;NM_001128588	TSS200;TSS200;TSS200				NA					TRUE	TRUE	345
cg17243289	0.043726185	0.364063097	chr18	45458021	+	SMAD2;SMAD2;SMAD2	NM_005901;NM_001135937;NM_001003652	TSS1500;TSS1500;TSS1500			RDMR	NA	18:43710386-43712070				NA	TRUE	346
cg12459502	-0.094150797	-0.665914705	chr18	60904237	+	BCL2	NM_000633	Body		chr18:60904218-60904218		NA					TRUE	TRUE	347
cg19283806	-0.117204493	-0.099176907	chr18	66389420	+	CCDC102B	NM_001093729	5'UTR			DMR	NA		18:66388995-66389733			NA	TRUE	348
cg10052840	-0.071280662	0.245934402	chr19	4558119	-	SEMA6B	NM_032108	Body				NA	19:4508793-4509130	19:4557618-4558992			TRUE	TRUE	349
cg26005082	0.123793917	-0.013943797	chr19	4769660	-	MIR7-3;C19orf30	NR_029607;NR_027148	TSS1500;Body				NA	19:4720522-4720736	19:4769500-4769890			TRUE	TRUE	350
cg11766468	0.055276883	0.757024016	chr19	7923041	-	EVI5L;EVI5L	NM_145245;NM_001159944	Body;Body			DMR	NA		19:7923033-7923363			NA	TRUE	351
cg10586358	-0.045978588	-0.784622293	chr19	13029889	+	SYCE2	NM_001105578	Body				NA	19:12890801-12891342	19:13029778-13030512			NA	TRUE	352
cg14556683	-0.137408439	0.795615318	chr19	15342982	-	EPHX3;EPHX3	NM_024794;NM_001142886	1stExon;Body			DMR	NA	19:15203635-15204238	19:15341951-15343455			NA	TRUE	353
cg26842024	0.484248748	0.355475288	chr19	16436122	-	KLF2	NM_016270	Body				NA	19:16296270-16299051				TRUE	TRUE	354
cg18335931	-0.250129622	-0.566875452	chr19	18229242	-	MAST3	NM_015016	Body				NA		19:18229120-18229727			NA	TRUE	355
cg17861230	-0.317548444	0.746900157	chr19	18343901	-	PDE4C	NM_000923	Body				NA	19:18204497-18205521	19:18343231-18344766			TRUE	TRUE	356
cg10498798	-0.270927703	-0.721581166	chr19	35843186	+	FFAR1	NM_005303	1stExon				NA	19:40534321-40535712	19:35842950-35844133			NA	TRUE	357
cg27212234	1.019895062	0.368292059	chr19	36048757	-	ATP4A	NM_000704	Body				TRUE	19:40740436-40741909	19:36048604-36049438			NA	TRUE	358
cg17110586	-0.068681588	0.750872213	chr19	36454623	+							NA		19:36454435-36454781			NA	TRUE	359
cg21944491	-0.061976207	-0.512715776	chr19	41119829	+	LTBP4;LTBP4;LTBP4	NM_001042545;NM_001042544;NM_003573	Body;Body;Body	high-CpG:45811114-45811940		DMR	TRUE	19:45810885-45812886	19:41119446-41120211			NA	TRUE	360
cg21940708	0.226979162	0.361116343	chr19	50191683	+	PRMT1;C19orf76;PRMT1;PRMT1	NM_001536;NM_001101340;NM_198319;NM_198318	3'UTR;TSS1500;3'UTR;3'UTR				TRUE					NA	TRUE	361
cg15811427	-0.003532559	0.446821666	chr19	52254222	+	FPR1	NM_002029	5'UTR		chr19:52253774-52253774		NA					TRUE	TRUE	362
cg06458239	0.346805453	0.220985061	chr19	58038573	-	ZNF549	NM_153263	TSS200				NA	19:62730385-62731006	19:58038386-58039306			TRUE	TRUE	363
cg10729426	0.234125732	0.227803908	chr19	58038585	-	ZNF549	NM_153263	TSS200				NA	19:62730385-62731006	19:58038386-58039306			NA	TRUE	364
cg21911021	0.043583857	0.776306529	chr19	58095011	+	ZIK1	NM_001010879	TSS1500				NA	19:62786552-62787551	19:58094927-58095843			NA	TRUE	365
cg24834740	-0.071902899	-0.534661858	chr20	37434552	-	PPP1R16B	NM_015568	5'UTR			DMR	TRUE	20:36867542-36869198	20:37434191-37434662	chr20:37433065-37436304	chr20:37432943-37442322	TRUE	TRUE	366
cg19702785	0.127633982	0.500920507	chr20	43727089	-	KCNS1	NM_002251	Body				NA	20:43159665-43160717	20:43726268-43727871			NA	TRUE	367
cg07547549	0.21256908	0.836496088	chr20	44658225	-	SLC12A5;SLC12A5	NM_020708;NM_001134771	Body;Body				NA	20:44090882-44092713	20:44657985-44658436			NA	TRUE	368
cg12303084	0.651720134	0.571567335	chr20	45985741	+	ZMYND8;ZMYND8;ZMYND8	NM_012408;NM_183047;NM_183048	TSS1500;TSS1500;TSS1500				NA		20:45985147-45986657	chr20:45985260-45986725	chr20:45970763-45992240	NA	TRUE	369
cg27544190	-0.578092646	0.173040114	chr21	33785434	+	C21orf63	NM_058187	Body				NA	21:32705786-32707588				TRUE	TRUE	370
cg01262913	-0.001998917	-0.76617995	chr21	38580486	+	DSCR9	NR_026719	TSS1500				TRUE		21:38580455-38581321			TRUE	TRUE	371
cg17274064	-0.061618839	-0.500624743	chr21	40033892	-	ERG;ERG	NM_004449;NM_001136154	TSS200;TSS200				NA					TRUE	TRUE	372
cg09428349	-0.409120335	-0.448353619	chr21	43346858	-	C2CD2;C2CD2	NM_015500;NM_199050	Body;TSS200				TRUE		21:43345843-43347306			NA	TRUE	373
cg10636297	0.185919976	0.590808144	chr21	45405724	+	AGPAT3;AGPAT3	NM_001037553;NM_020132	3'UTR;3'UTR				TRUE	21:44230073-44230658	21:45405330-45406553			NA	TRUE	374
cg12373771	-0.13986391	0.376661656	chr22	17601381	-	CECR6;CECR6	NM_031890;NM_001163079	1stExon;5'UTR				NA	22:15980564-15982862				TRUE	TRUE	375
cg05442902	-0.240314839	-0.662962544	chr22	21369010	-	MGC16703;P2RX6;P2RX6	NR_003608;NM_005446;NM_001159554	TSS1500;TSS1500;TSS1500				TRUE		22:21368080-21369261			TRUE	TRUE	376
cg16612562	0.001293445	-0.334715082	chr22	29712045	+	RASL10A;RASL10A	NM_006477;NM_001007279	TSS1500;TSS1500				NA	22:28039282-28042062		chr22:29706200-29713148	chr22:29710682-29712461	TRUE	TRUE	377
cg19015086	0.153297682	0.393425512	chr22	30817820	-	SEC14L2	NM_012429	Body			RDMR	NA					NA	TRUE	378
cg21205978	0.081658381	-0.523771862	chr22	36044151	+	APOL6	NM_030641	TSS1500				NA		22:36044011-36045175			NA	TRUE	379
cg01949403	0.059578005	0.570214423	chr22	36562402	-	APOL3;APOL3	NM_145642;NM_145641	TSS200;TSS200				NA					NA	TRUE	380
cg08415592	-0.147841089	-0.643703696	chr22	36648973	-	APOL1;APOL1;APOL1;APOL1	NM_001136541;NM_003661;NM_001136540;NM_145343	TSS200;TSS200;TSS200;TSS200				NA		22:36648819-36649508			NA	TRUE	381
cg19853760	-0.061453988	0.129107973	chr22	38071677	+	LGALS1;LGALS1	NM_002305;NM_002305	1stExon;5'UTR				NA		22:38070968-38071698	chr22:38070806-38073741	chr22:38070797-38073786	TRUE	TRUE	382
cg23124451	-0.037615246	0.421157695	chr22	39548131	+	CBX7	NM_175709	Body				NA	22:37877959-37879580		chr22:39546864-39549854	chr22:39547710-39549680	TRUE	TRUE	383
cg25459323	0.023730178	-0.182418885	chr22	42372359	-	SEPT3;SEPT3	NM_145733;NM_019106	TSS1500;TSS1500				NA		22:42372199-42373494			TRUE	TRUE	384
cg27187881	-0.244556011	-0.358211058	chr22	42466345	+	NAGA;NAGA	NM_000262;NM_000262	1stExon;5'UTR				NA		22:42465847-42467456			TRUE	TRUE	385
cg00343092	-0.082073172	-0.199434971	chr22	43547974	+	TSPO;TSPO	NM_000714;NM_007311	5'UTR;5'UTR				TRUE	22:41877115-41878096				TRUE	TRUE	386
cg00347775	0.000841664	0.255306411	chr22	43829831	+	MPPED1	NM_001044370	Body				NA					NA	TRUE	387
cg27131176	-0.192317101	-0.184622935	chr22	46450114	+	C22orf26;LOC150381	NM_018280;NR_027034	TSS200;Body				NA	22:44828094-44829040				NA	TRUE	388
cg22982767	-0.41219696	-0.431591804	chr22	46454012	+	LOC150381	NR_027034	Body			RDMR	NA		22:46453923-46454538			NA	TRUE	389
cg07016730	-0.029382863	0.509564499	chr22	50912306	+	SBF1	NM_002972	Body			RDMR	NA					NA	TRUE	390
cg01892695	-0.250618874	-0.098547272	chrX	99893802	-							NA					NA	TRUE	391
